# Supplementary material for: Asymmetric trifluoromethylthiolation of azlactones under chiral phase transfer catalysis
Source: Royal Society of Chemistry journal article supplement (doi:10.1039/d0ob00476f), 2020-01-01
Supplement: d0ob00476f1.pdf [file d0ob00476f1.pdf]

## Supporting Information

### Asymmetric Trifluoromethylthiolation of Azlactones under Chiral Phase Transfer Catalysis

Marina Sicignano,<sup>a</sup> Ricardo I. Rodríguez,<sup>b</sup> Vito Capaccio,<sup>b</sup> Fabio Borello,<sup>a</sup> Rafael Cano,<sup>b</sup> Francesco De Riccardis,<sup>a</sup> Luca Bernardi,<sup>c</sup> Sergio Díaz-Tendero,<sup>d</sup> Giorgio Della Sala<sup>a,\*</sup> and José Alemán<sup>b,\*</sup>

[gdsala@unisa.it](mailto:gdsala@unisa.it); [jose.aleman@uam.es](mailto:jose.aleman@uam.es)

<sup>a</sup> *Dipartimento di Chimica e Biologia "A. Zambelli", Università degli Studi di Salerno, Via Giovanni Paolo II 132, 84084 Fisciano, SA, Italy.*

<sup>b</sup> *Organic Chemistry Department, Módulo 1, Universidad Autónoma de Madrid, 28049 Madrid, Spain.*

<sup>c</sup> *Department of Industrial Chemistry "Toso Montanari" & INSTM RU Bologna, Alma Mater Studiorum University of Bologna, Viale del Risorgimento 4, 40136 Bologna, Italy.*

<sup>d</sup> *Chemistry Department, Módulo 13, Universidad Autónoma de Madrid, 28049 Madrid, Spain.*

#### CONTENTS

|                                                                               |     |
|-------------------------------------------------------------------------------|-----|
| General information                                                           | S2  |
| Synthesis of azlactones <b>1a-o</b>                                           | S3  |
| Typical procedure for the synthesis of racemic compounds <b>3e</b>            | S4  |
| Optimization of reaction conditions                                           | S4  |
| Experimental and theoretical circular dichroism spectra of compound <b>3k</b> | S7  |
| DFT calculations                                                              | S8  |
| References                                                                    | S9  |
| Copies of NMR spectra                                                         | S10 |
| Copies of chromatograms                                                       | S33 |

## General information

All chemicals and solvents were purchased from commercial suppliers and used without further purification. *N*-(trifluoromethylthio)phthalimide **2** was prepared according the reported procedure.<sup>1</sup> Catalysts **I-XXV**, **XXVIII-XXX**<sup>2</sup> and catalysts **XXVI**, **XXVII**<sup>3</sup> were prepared following the general procedure described in the literature.<sup>2</sup> Reactions were monitored by analytical thin layer chromatography (TLC) on precoated silica gel plates (0.25 mm) and visualized by UV light. Flash chromatography was performed on Silica Gel 60 (particle size: 0.040–0.063 mm). <sup>1</sup>H-, <sup>13</sup>C- and <sup>19</sup>F- NMR spectra were recorded on a Bruker Avance III 300 MHz spectrometer and a Bruker Avance-400 spectrometer at room temperature in CDCl<sub>3</sub>. All NMR spectra were referenced to residual CHCl<sub>3</sub> (7.26 ppm, <sup>1</sup>H; 77.16 ppm, <sup>13</sup>C). The following abbreviations are used to indicate the multiplicity in NMR spectra: s = singlet; d = doublet; dd = double doublet; t = triplet; q = quartet; m = multiplet. Coupling constants (*J*) are quoted in Hertz. Optical rotations were measured on a Perkin-Elmer 241 MC Polarimeter in 10 cm path length cells and are reported as follows:  $[\alpha]_D^T = (c \text{ in g/100 mL, solvent})$ . High resolution mass spectra (HRMS) were acquired using an *Agilent Technologies 6120 Quadrupole LC/MS*, and *MassWorks* software ver. 4.0.0.0 (Cerno Bioscience) was used for the formula identification. *MassWorks* is a MS calibration software which calibrates for isotope profile as well as for mass accuracy allowing highly accurate comparisons between calibrated and theoretical spectra. The samples were ionized in positive ion mode using a ESI ion source. Enantiomeric ratios were determined by chiral HPLC or by Supercritical Fluid Chromatography (SFC) using CHIRALPAK® AS-H (250 x 4.6 mm, 5 μm) and IB (250 x 4.6 mm, 5 μm) columns.

## Synthesis azlactones 1a-o

The azlactones **1a-o** were prepared in two steps, slightly modifying synthetic procedures reported in the literature.

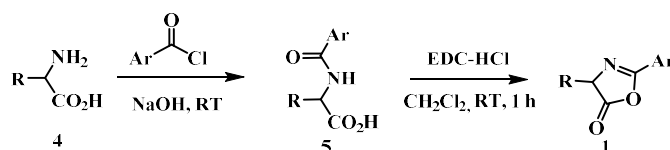

**STEP 1.**<sup>4</sup> To a solution of amino acid **4** (1.0 eq., 15.0 mmol) in 2 M NaOH aqueous solution (18 ml), aroyl chloride was added (1.0 eq., 15.0 mmol). The resulting reaction mixture was stirred at room temperature until complete homogenization and then acidified to pH 2 by adding 1 M HCl aqueous solution. After 2 hours, the mixture was extracted with EtOAc (2 x 50 ml) and the combined organic phases were dried over Na<sub>2</sub>SO<sub>4</sub> and concentrated under reduced pressure. The crude residue **5** was used in the next step without further purification.

**STEP 2.**<sup>5</sup> *N*-aroyl amino acid **5** (1 eq., 15 mmol) and EDC (1.3 eq., 19.5 mmol) were dissolved in anhydrous CH<sub>2</sub>Cl<sub>2</sub> (50 ml) under nitrogen atmosphere. The resulting reaction mixture was stirred at room temperature for 1 hour. The mixture was diluted with additional 50 ml of CH<sub>2</sub>Cl<sub>2</sub> and washed with water (2 x 50 ml) and brine solution (30 ml). Then, the organic phase was dried over Na<sub>2</sub>SO<sub>4</sub> and concentrated under reduced pressure. In all cases products were obtained in a form suitable for use without further purification.

The characterization data of the compound **1a-e**, **1g**, **1h**, **1j-l** and **1n-o** matched those previously reported.<sup>6</sup> Characterization data of unknown azlactones **1f**, **1i** and **1m** are reported below.

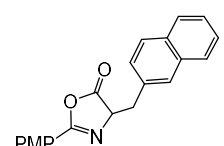

**2-(4-methoxyphenyl)-4-(naphthalen-2-ylmethyl)oxazol-5(4H)-one (1f):** Obtained as a yellow solid (4.6 g, 92% yield), mp 116-117 °C. <sup>1</sup>H NMR (300 MHz, CDCl<sub>3</sub>) δ 7.87 (d, *J* = 8.8 Hz, 2H), 7.83–7.71 (m, 4H), 7.51–7.37 (m, 3H), 6.90 (d, *J* = 8.8 Hz, 2H), 4.75 (dd, *J* = 6.8, 4.9 Hz, 1H), 3.78 (s, 3H), 3.53 (dd, *J* = 14.0, 4.9 Hz, 1H), 3.33 (dd, *J* = 14.0, 6.8 Hz, 1H). <sup>13</sup>C NMR (75 MHz, CDCl<sub>3</sub>) δ 177.9, 163.2, 161.5, 133.4, 133.3, 132.6, 129.8, 128.4, 128.0, 127.8, 127.8, 127.7, 126.1, 125.8, 118.1, 114.2, 66.6, 55.4, 37.6. HRMS (ESI) [*M* + *H*<sup>+</sup>] calcd for C<sub>21</sub>H<sub>18</sub>NO<sub>3</sub><sup>+</sup> 332.1281, found 332.1286.

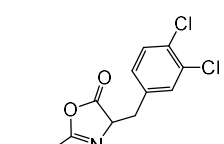

**4-(3,4-dichlorobenzyl)-2-(4-methoxyphenyl)oxazol-5(4H)-one (1i):** Obtained as a yellow solid (4.6 g, 90% yield), mp 108-109 °C. <sup>1</sup>H NMR (300 MHz, CDCl<sub>3</sub>) δ 7.84 (d, *J* = 8.8 Hz, 2H), 7.36 (d, *J* = 1.7 Hz, 1H), 7.30 (d, *J* = 8.2 Hz, 1H), 7.09 (dd, *J* = 8.2, 1.7 Hz, 1H), 6.92 (d, *J* = 8.8 Hz, 2H), 4.60 (dd, *J* = 6.8, 5.0 Hz, 1H), 3.83 (s, 3H), 3.28 (dd, *J* = 14.1, 5.0 Hz, 1H), 3.07 (dd, *J* = 14.1, 6.8 Hz, 1H). <sup>13</sup>C NMR (75 MHz, CDCl<sub>3</sub>) δ 177.3, 163.4, 161.8, 135.8, 132.3, 131.6, 131.3, 130.3, 129.8, 129.0, 117.7, 114.3, 65.9, 55.5, 36.4. HRMS (ESI) [*M* + *H*<sup>+</sup>] calcd for C<sub>17</sub>H<sub>14</sub>Cl<sub>2</sub>NO<sub>3</sub><sup>+</sup> 350.0345, found 350.0349.

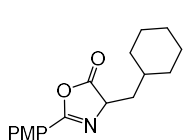

**4-(cyclohexylmethyl)-2-(4-methoxyphenyl)oxazol-5(4H)-one (1m):** Obtained as a white solid (3.6 g, 84% yield), mp 115-114 °C. <sup>1</sup>H NMR (300 MHz, CDCl<sub>3</sub>) δ 7.92 (d, *J* = 8.9 Hz, 2H), 6.96 (d, *J* = 8.9 Hz, 2H), 4.41 (dd, *J* = 8.6, 5.5 Hz, 1H), 3.86 (s, 3H), 1.93 – 1.54 (m, 8H), 1.39–1.10 (m, 3H), 1.07–0.85 (m, 2H). <sup>13</sup>C NMR (75 MHz, CDCl<sub>3</sub>) δ 179.3, 163.1, 161.2, 129.8, 118.3, 114.2, 63.2, 55.5, 39.6, 34.3, 33.5, 32.7, 26.4, 26.1, 26.0. HRMS (ESI) [*M* + *H*<sup>+</sup>] calcd for C<sub>17</sub>H<sub>12</sub>NO<sub>3</sub><sup>+</sup> 288.1594, found 288.1591.

### Typical procedure for the synthesis of racemic compound 3e

In a 4 ml vial, to a mixture of azlactone **1e** (1.0 eq., 0.10 mmol, 28.1 mg), *N*-(trifluoromethylthio)phthalimide **2** (1.2 eq., 0.12 mmol, 29.7 mg), TBAB (0.20 eq., 0.02 mmol, 6.4 mg), and K<sub>3</sub>PO<sub>4</sub> (0.1 eq., 0.01 mmol, 2.1 mg) dichloromethane (1.0 mL) was added and the reaction mixture was stirred for 1 hour at -20 °C. Then, the mixture was filtered and concentrated *in vacuo*. The crude residue was purified by chromatography (10 g silica gel cyclohexane-ethyl acetate, 99/1 to 80/20) to afford the desired product **3e** (30.5 mg, 80 % yield) as a white solid.

### General procedure for the enantioselective trifluoromethylthiolation of azlactones

In a 4 ml vial, to a mixture of the selected azlactone (1.0 eq., 0.10 mmol), *N*-(trifluoromethylthio)phthalimide **2** (1.2 eq., 0.12 mmol, 29.7 mg), catalyst **VIII** (0.20 eq., 0.02 mmol, 12.6 mg), and K<sub>3</sub>PO<sub>4</sub> (0.1 eq., 0.01 mmol, 2.1 mg) dichloromethane (1.0 mL) was added and the reaction mixture was stirred for the indicated time at -20 °C. Then, the mixture was filtered and concentrated *in vacuo*. The crude residue was purified by chromatography (10 g silica gel cyclohexane-ethyl acetate, 99/1 to 80/20) to afford the corresponding product.

### Optimization of reaction conditions

#### Base screening of asymmetric trifluoromethylthiolation of 1a

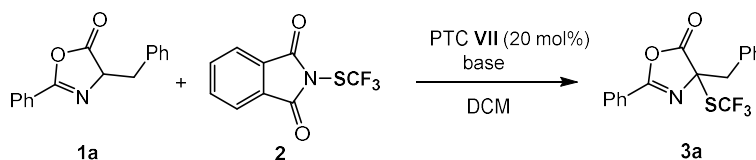

| entry | Base                                       | T (°C) | t (h) | yield (%) <sup>a</sup> | er <sup>b</sup> |
|-------|--------------------------------------------|--------|-------|------------------------|-----------------|
| 1     | K <sub>3</sub> PO <sub>4</sub> (aq.) 10%   | RT     | 16    | 28                     | 64:36           |
| 2     | K <sub>3</sub> PO <sub>4</sub> (s) 5.0 eq. | RT     | 1     | 42                     | 57:43           |
| 3     | K <sub>3</sub> PO <sub>4</sub> (s) 5.0 eq. | 0      | 2     | 45                     | 59:41           |
| 4     | K <sub>3</sub> PO <sub>4</sub> (s) 0.1 eq. | RT     | 5     | 64                     | 65:35           |
| 5     | K <sub>3</sub> PO <sub>4</sub> (s) 0.1 eq. | -20    | 65    | 74                     | 72:28           |
| 6     | K <sub>3</sub> PO <sub>4</sub> (s) 0.1 eq. | -40    | 65    | 35                     | 62:38           |

<sup>a</sup> Isolated yield. <sup>b</sup> Determined by HPLC on a chiral stationary phase.

## Catalyst screening for asymmetric trifluoromethylthiolation of 1a

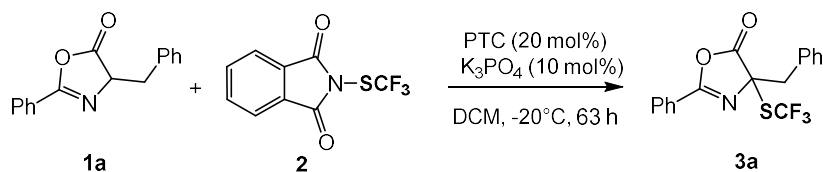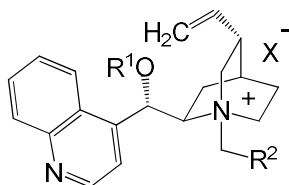

- I** R<sup>1</sup>= allyl; R<sup>2</sup>= Ph; X= Br **3a**: 80%y; 51:49er  
**II** R<sup>1</sup>= benzyl; R<sup>2</sup>= Ph; X= Br **3a**: 86%y; 52:48er  
**III** R<sup>1</sup>= 1-adamantyl; R<sup>2</sup>= Ph; X= Br **3a**: 72%y; 51:49er  
**IV** R<sup>1</sup>= H; R<sup>2</sup>= Ph; X= Br **3a**: 91%y; 72:28er  
**V** R<sup>1</sup>= H; R<sup>2</sup>= 4-OMe-Ph; X= Br **3a**: 78%y; 53:47er  
**VI** R<sup>1</sup>= H; R<sup>2</sup>= 4-NO<sub>2</sub>-Ph; X= Br **3a**: 57%y; 77:23er  
**VII** R<sup>1</sup>= H; R<sup>2</sup>= 3,5-(CF<sub>3</sub>)<sub>2</sub>-Ph; X= Br **3a**: 74%y; 72:28er  
**IX** R<sup>1</sup>= H; R<sup>2</sup>= 4-Cl-Ph; X= Br **3a**: 57%y; 75:25er  
**X** R<sup>1</sup>= H; R<sup>2</sup>= 4-F-Ph; X= Br **3a**: 73%y; 75:25er  
**XI** R<sup>1</sup>= H; R<sup>2</sup>= 4-CF<sub>3</sub>-Ph; X= Br **3a**: 97%y; 76:24er  
**XII** R<sup>1</sup>= H; R<sup>2</sup>= 4-*t*-Bu-Ph; X= Br **3a**: 63%y; 68:32er  
**XIII** R<sup>1</sup>= H; R<sup>2</sup>= 2-CF<sub>3</sub>-Ph; X= Br **3a**: 47%y; 57:43er  
**XIV** R<sup>1</sup>= H; R<sup>2</sup>= 2-NO-Ph; X= Br **3a**: 57%y; 55:45er  
**XV** R<sup>1</sup>= H; R<sup>2</sup>= 2-OMe-Ph; X= Br **3a**: 94%y; 63:37er  
**XVI** R<sup>1</sup>= H; R<sup>2</sup>= 2-CN-Ph; X= Br **3a**: 69%y; 56:44er  
**XVII** R<sup>1</sup>= H; R<sup>2</sup>= 2,3-(F)<sub>2</sub>-Ph; X= Br **3a**: 59%y; 70:30er  
**XVIII** R<sup>1</sup>= H; R<sup>2</sup>= 3,4,5-(F)<sub>3</sub>-Ph; X= Br **3a**: 63%y; 78:22er  
**XIX** R<sup>1</sup>= H; R<sup>2</sup>= 2,3,4,5,6-(F)<sub>5</sub>-Ph; X= Br **3a**: 80%y; 72:28er  
**XX** R<sup>1</sup>= H; R<sup>2</sup>= 2,3,5,6-(F)<sub>4</sub>-4-CF<sub>3</sub>-Ph; X= Br **3a**: 80%y; 73:27er  
**XXI** R<sup>1</sup>= H; R<sup>2</sup>= 9-anthracenyl; X= Br **3a**: 27%y; 76:24er

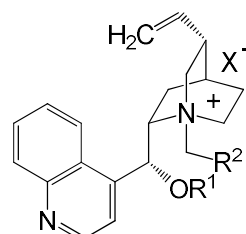

- XXII** R<sup>1</sup>=H; R<sup>2</sup>= Ph; X= Cl **3a**: 70%y; 58:42er  
**XXIII** R<sup>1</sup>=Ph; R<sup>2</sup>= Ph; X= Br **3a**: 72%y; 50:50er  
**XXIV** R<sup>1</sup>=Ph; R<sup>2</sup>= 2,3,4-(F)<sub>3</sub>-Ph; X= Br **3a**: 88%y; 55:45er  
**XXV** R<sup>1</sup>=H; R<sup>2</sup>= 9-anthracenyl; X= Cl **3a**: 69%y; 65:35er

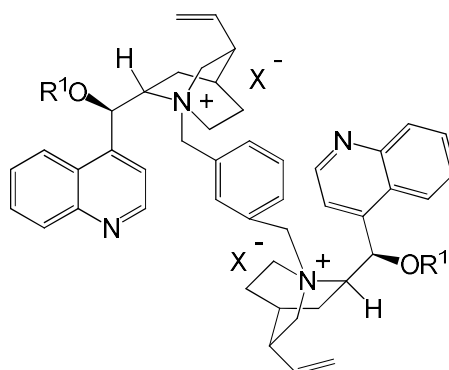

- XXVI** R<sup>1</sup>= H; X= Br **3a**: 46%y; 62:38er  
**XXVII** R<sup>1</sup>= Bn; X= Br **3a**: 85%y; 60:40er

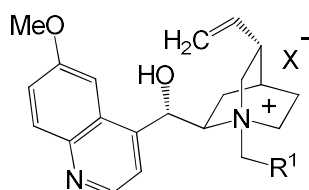

- VIII** R<sup>1</sup>= 3,5-(CF<sub>3</sub>)<sub>2</sub>-Ph; X= Br **3a**: 49%y; 82:18er  
**XXVIII** R<sup>1</sup>= 4-NO<sub>2</sub>-Ph; X= Br **3a**: 44%y; 78:22er  
**XXIX** R<sup>1</sup>= 2,3,4-(F)<sub>3</sub>-Ph; X= Br **3a**: 46%y; 70:30er  
**XXX** R<sup>1</sup>= 3,4,5-(F)<sub>3</sub>-Ph; X= Br **3a**: 34%y; 80:20er

## Screening of reaction conditions for asymmetric trifluoromethylthiolation of 1e

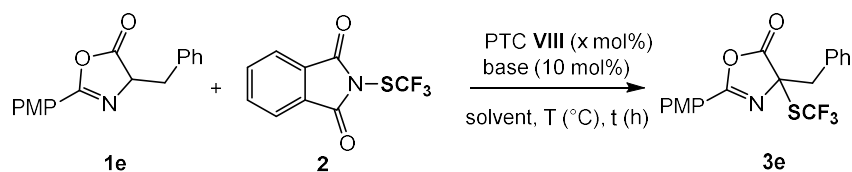

| entry          | Base                            | solvent           | (x mol%) | T (°C) | t (h) | yield (%) <sup>a</sup> | er <sup>b</sup> |
|----------------|---------------------------------|-------------------|----------|--------|-------|------------------------|-----------------|
| 1              | K <sub>3</sub> PO <sub>4</sub>  | DCM               | 20       | -20    | 1     | 84                     | 94:6            |
| 2 <sup>c</sup> | K <sub>3</sub> PO <sub>4</sub>  | DCM               | 20       | -20    | 4     | 89                     | 75:25           |
| 3              | K <sub>2</sub> CO <sub>3</sub>  | DCM               | 20       | -20    | 1     | 80                     | 83:17           |
| 4              | CS <sub>2</sub> CO <sub>3</sub> | DCM               | 20       | -20    | 1     | 79                     | 86:14           |
| 5              | NaHCO <sub>3</sub>              | DCM               | 20       | -20    | 1     | 83                     | 88:12           |
| 6              | KF                              | DCM               | 20       | -20    | 1     | 82                     | 90:10           |
| 7              | K-Phthalimide                   | DCM               | 20       | -20    | 2     | 83                     | 80:20           |
| 8              | K <sub>3</sub> PO <sub>4</sub>  | CHCl <sub>3</sub> | 20       | -20    | 6     | 83                     | 83:17           |
| 9              | K <sub>3</sub> PO <sub>4</sub>  | Et <sub>2</sub> O | 20       | -20    | 2     | 87                     | 76:24           |
| 10             | K <sub>3</sub> PO <sub>4</sub>  | THF               | 20       | -20    | 1     | 85                     | 67:33           |
| 11             | K <sub>3</sub> PO <sub>4</sub>  | DCE               | 20       | -20    | 3     | 88                     | 72:28           |
| 12             | K <sub>3</sub> PO <sub>4</sub>  | toluene           | 20       | -20    | 6     | 88                     | 83:17           |
| 13             | K <sub>3</sub> PO <sub>4</sub>  | DCM               | 10       | -20    | 1     | 86                     | 90:10           |
| 14             | K <sub>3</sub> PO <sub>4</sub>  | DCM               | 5        | -20    | 1     | 87                     | 89:11           |
| 15             | K <sub>3</sub> PO <sub>4</sub>  | DCM               | 2        | -20    | 1     | 89                     | 86:14           |
| 16             | K <sub>3</sub> PO <sub>4</sub>  | DCM               | 20       | -40    | 3     | 82                     | 91:9            |
| 17             | K <sub>3</sub> PO <sub>4</sub>  | DCM               | 20       | -70    | 6     | 85                     | 87:13           |

<sup>a</sup> Isolated yield. <sup>b</sup> Determined by HPLC on a chiral stationary phase. <sup>c</sup> Reaction performed with 5 mol% of K<sub>3</sub>PO<sub>4</sub>.

## Trifluoromethylthiolation of azlactones 1a-e promoted by TBAB

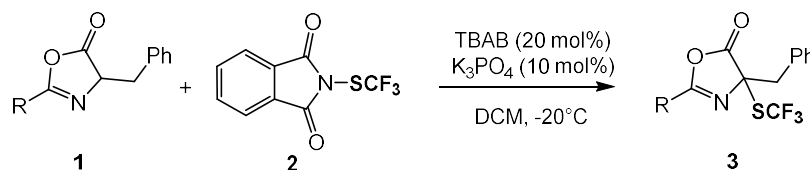

| entry | R                                                  | t (h) | yield (%) <sup>a</sup> |
|-------|----------------------------------------------------|-------|------------------------|
| 1     | 4-CN(C <sub>6</sub> H <sub>4</sub> )               | 168   | Degradation            |
| 2     | 4-CF <sub>3</sub> (C <sub>6</sub> H <sub>4</sub> ) | 168   | Degradation            |
| 3     | C <sub>6</sub> H <sub>5</sub>                      | 96    | 47                     |
| 4     | 4-Cl(C <sub>6</sub> H <sub>4</sub> )               | 19    | 60                     |
| 5     | 4-OMe(C <sub>6</sub> H <sub>4</sub> )              | 1     | 80                     |

<sup>a</sup> Isolated yield.

## Experimental and theoretical circular dichroism spectra of compound 3k

Electronic Circular Dichroism (CD) spectra were experimentally obtained at 25°C on a Jasco-815 CDspectrometer including a Jasco Peltier ETCT-762 temperature controller. Measurements were performed using quartz cuvettes (1cm), ( $c = 5.2E-5$  in DCM spectroscopic grade). The CD spectra were also simulated by means of density functional (DFT) simulations. To this we optimized the geometry of compound 3k at the CAM-B3LYP/cc-pVTZ level of theory, i.e. with the long-range-corrected version of B3LYP using the attenuating method<sup>7</sup>. Solvent effects (dichloromethane) were included within the Polarizable Continuum Model (PCM) using the integral equation formalism variant (IEFPCM)<sup>8</sup>. The same method was used to compute the CD spectra<sup>9</sup> within the time-dependent density functional theory (TDDFT)<sup>10</sup>. Figure S1 represents the experimental CD spectra of **3k** and the simulated one for both enantiomers, allowing to disentangle the chirality easily with the first two bands (transitions observed between 300 and 250 nm).

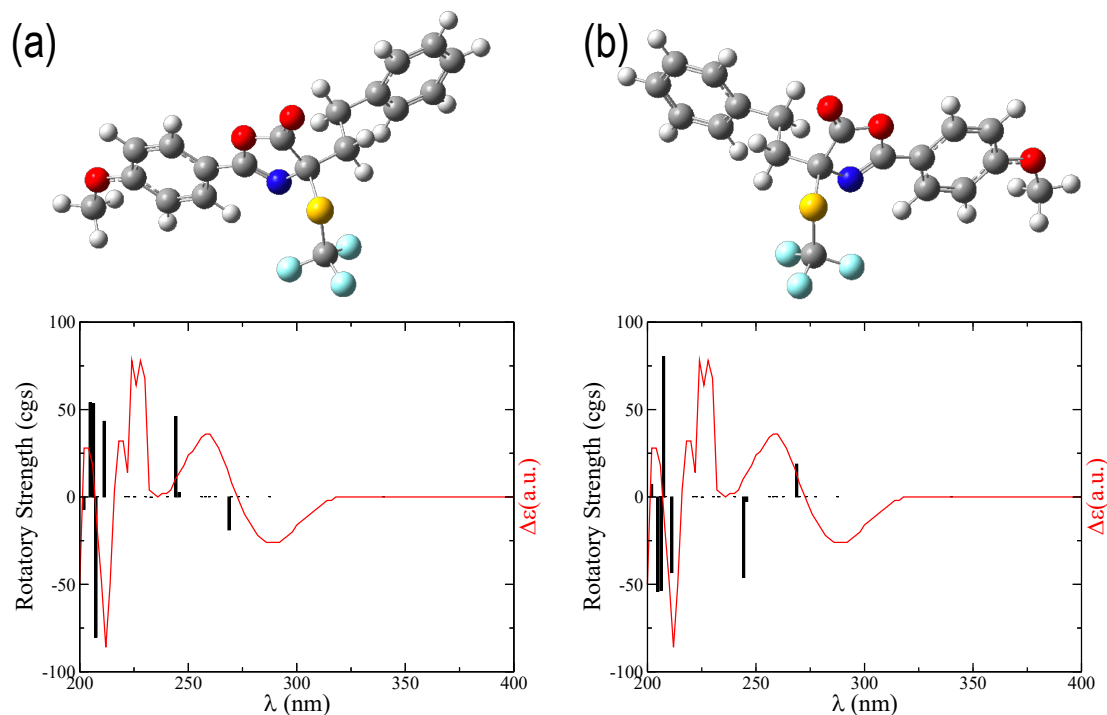

**Figure S1.** Experimentally measured CD spectra of compound **3k** (red curve) and simulation for both enantiomers (black bars). We can conclude that the measured spectra correspond to the left one, i.e. the **3k R** enantiomer.

### DFT calculations

The density functional theory (DFT) calculations were performed using the M062x functional<sup>11</sup>, specially developed to correctly reproduce non-covalent interactions, in combination with the 6-31++G(d,p) basis set, which includes both polarization and diffusion functions. Solvent effects (dichloromethane) were included within the Polarizable Continuum Model (PCM) using the integral equation formalism variant (IEFPCM)<sup>8</sup>. Atomic charges were computed within a Natural Bond Orbital analysis, using NBO version 3<sup>12</sup>.



## References

1. K. Kang, C. Xu and Q. Shen, *Org. Chem. Front.*, 2014, **1**, 294.
2. Y. Liu, B. A. Provencher, K. J. Bartelson and L. Deng, *Chem. Sci.*, 2011, **2**, 1301.
3. S.-s. Jew, B.-S. Jeong, M.-S. Yoo, H. Huh and H.-g. Park, *Chem. Commun.*, 2001, **14**, 1244.
4. C. Macovei, P. Vicennati, J. Quinton, M. C. Nevers, H. Volland, C. Creminon and F. Taran, *Chem. Commun.*, 2012, **48**, 4411.
5. A. D. Melhado, M. Luparia and F. D. Toste, *J. Am. Chem. Soc.*, 2007, **129**, 12638.
6. a) S. K. Nimmagadda, M. Liu, M. K. Karunananda, D.-W. Gao, Omar Apolinar, J. S. Chen, P. Liu and K. M. Engle, *Angew. Chem. Int. Ed.*, 2019, **58**, 3923; b) Y. Wang, Y. Chen, X. Li, Y. Mao, W. Chen, R. Zhan and H. Huang, *Org. Biomol. Chem.*, 2019, **17**, 3945; c) D. Uraguchi, Y. Ueki, A. Sugiyama and T. Ooi, *Chem. Sci.*, 2013, **4**, 1308; d) H. Hu, Y. Liu, J. Guo, L. Lin, Y. Xu, X. Liua and X. Feng, *Chem. Commun.*, 2015, **51**, 3835; e) T. Takafumi, T. Tsukushi, T. Taro, Y. Ryo and O. Takashi, *Org. Lett.*, 2018, **21**, 3541; f) T. Wang, Z. Yu, D. L. Hoon, C. Y. Phee, Y. Lan and Y. Lu, *J. Am. Chem. Soc.*, 2016, **138**, 265.
7. T. Yanai, D. Tew, and N. Handy, *Chem. Phys. Lett.*, 2004, **393**, 51.
8. J. Tomasi, B. Mennucci, and R. Cammi, *Chem. Rev.*, 2005, **105**, 2999.
9. J. Autschbach, T. Ziegler, S.J.A. van Gisbergen, and E.J. Baerends, *J. Chem. Phys.*, 2002, **116**, 6930.
10. M.E. Casida, C. Jamorski, K.C. Casida, and D.R. Salahub, *J. Chem. Phys.*, 1988, **108**, 4439.
11. Y. Zhao and D. G. Truhlar, *Theor. Chem. Acc.*, 2008, **120**, 215.
12. A. E. Reed, L. A. Curtiss, and F. Weinhold, *Chem. Rev.*, 1988, **88**, 899.

## NMR Spectra

### 2-(4-methoxyphenyl)-4-(naphthalen-2-ylmethyl)oxazol-5(4H)-one (1f)

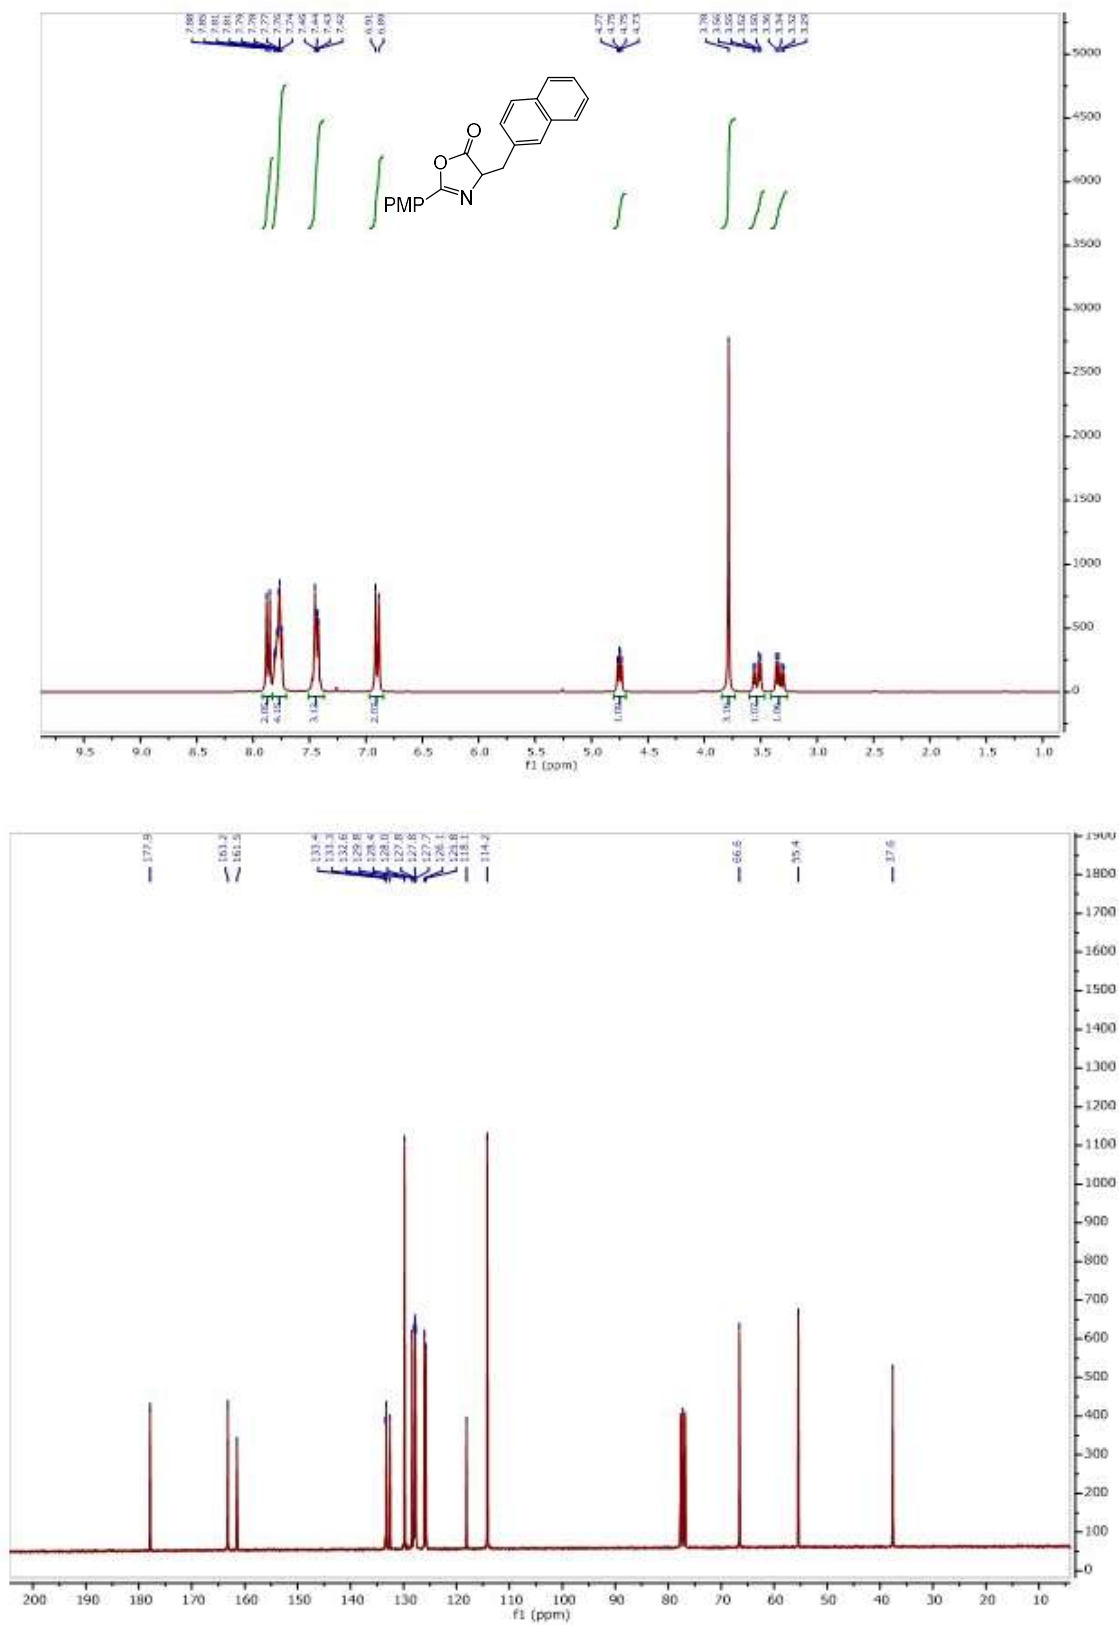

### 4-(3,4-dichlorobenzyl)-2-(4-methoxyphenyl)oxazol-5(4H)-one (1i)

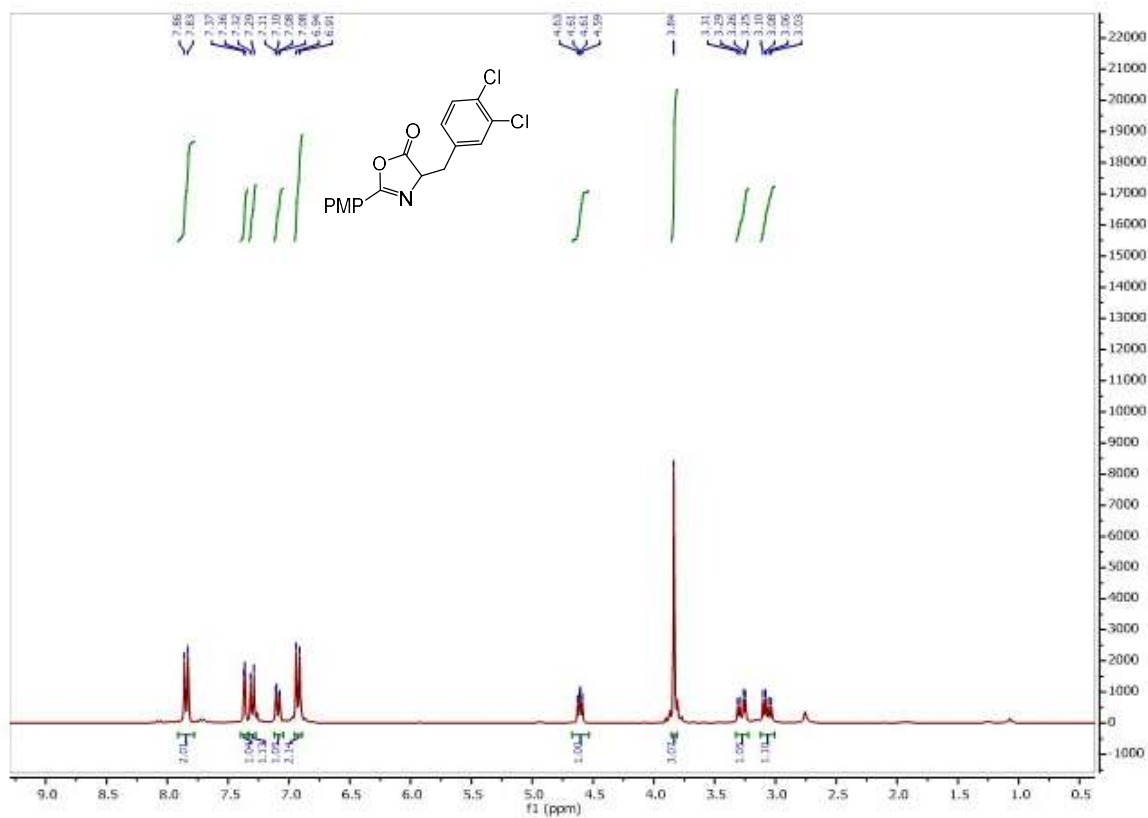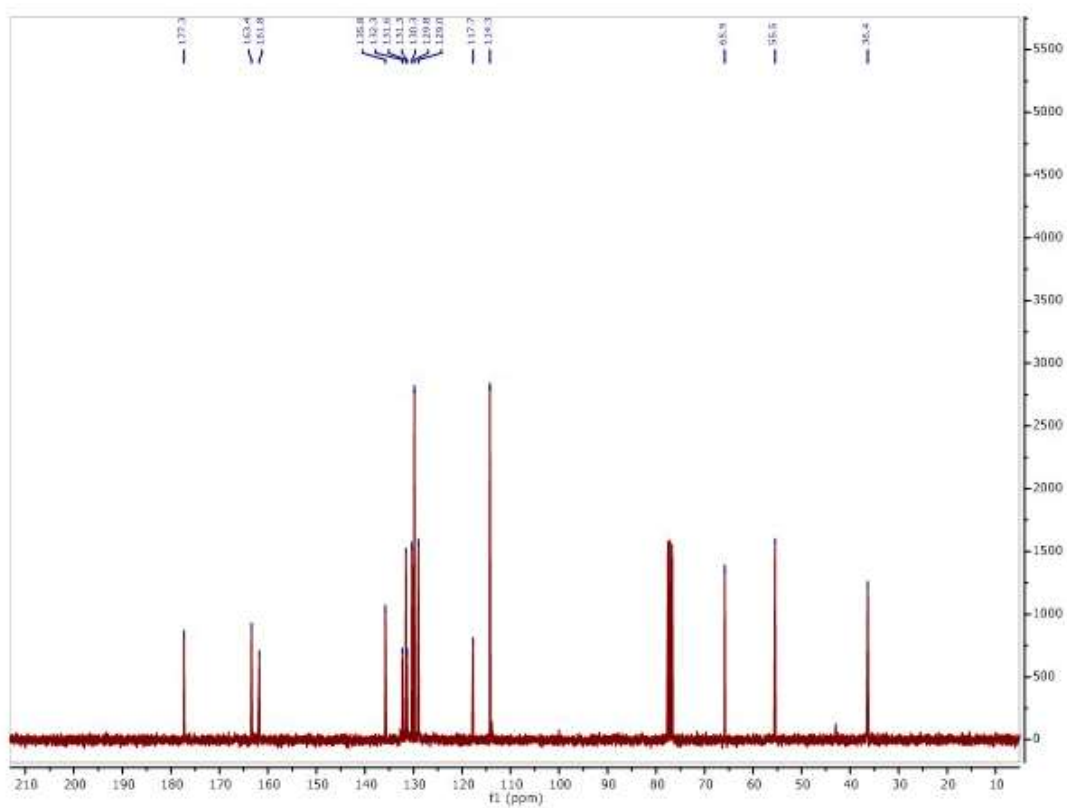

4-(cyclohexylmethyl)-2-(4-methoxyphenyl)oxazol-5(4H)-one (1m)

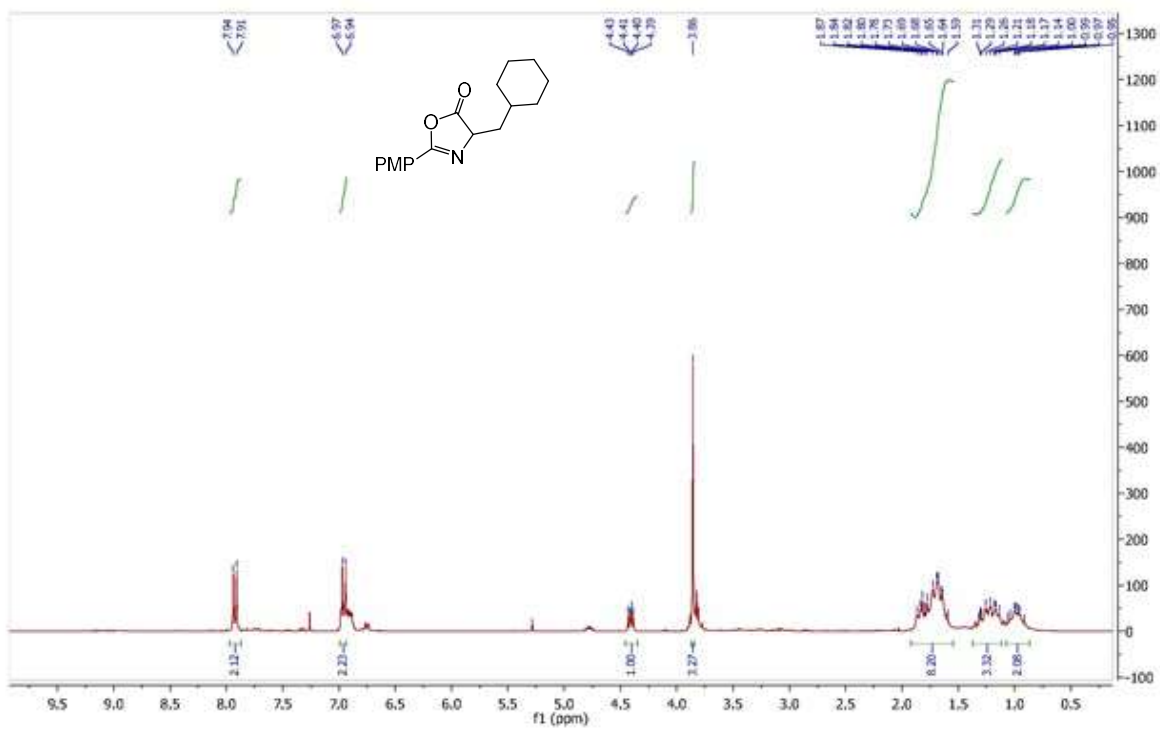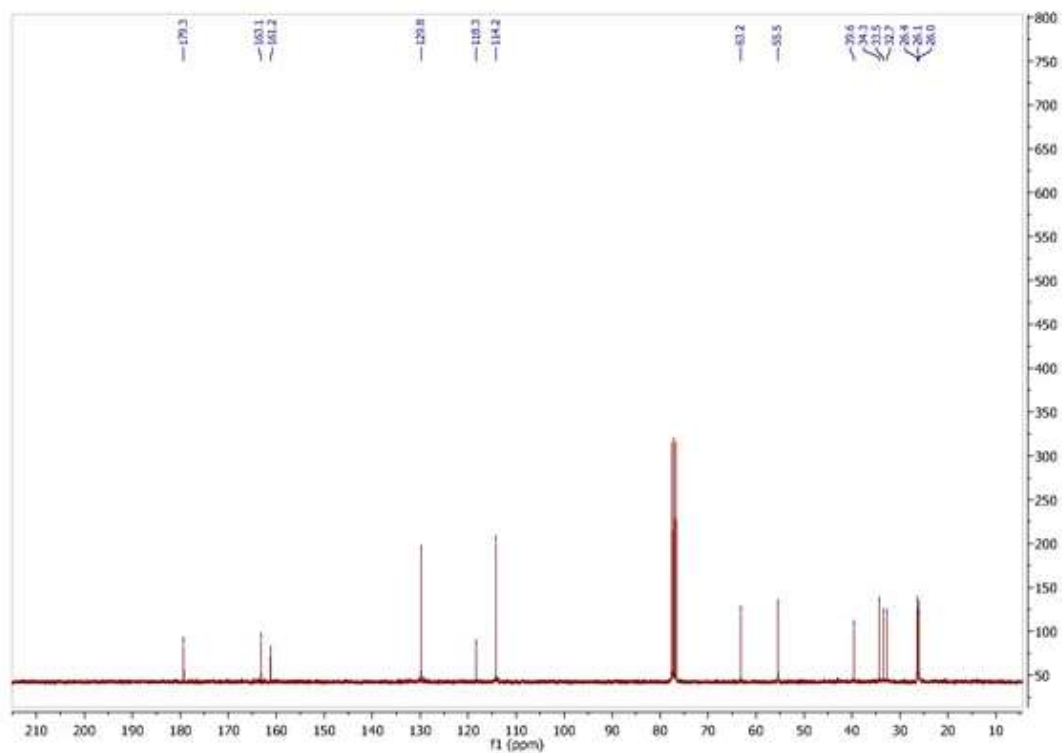

4-benzyl-2-(4-methoxyphenyl)-4-(trifluoromethyl)thiooxazol-5(4H)-one (3e)

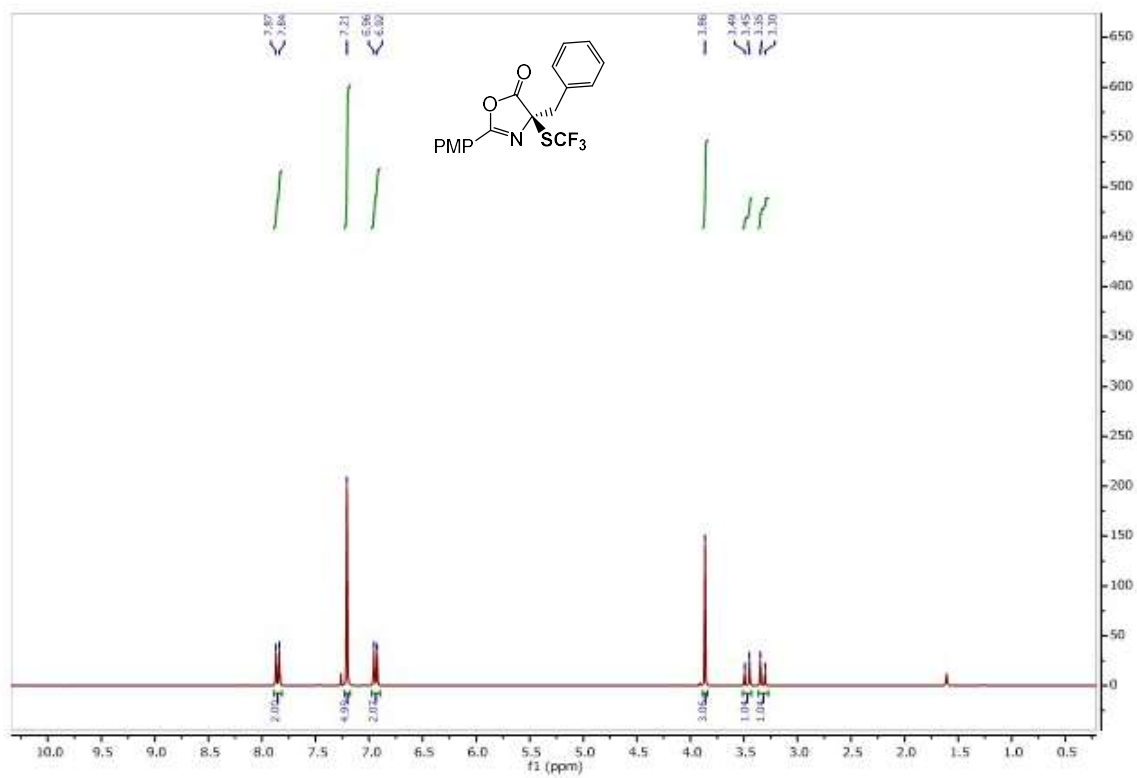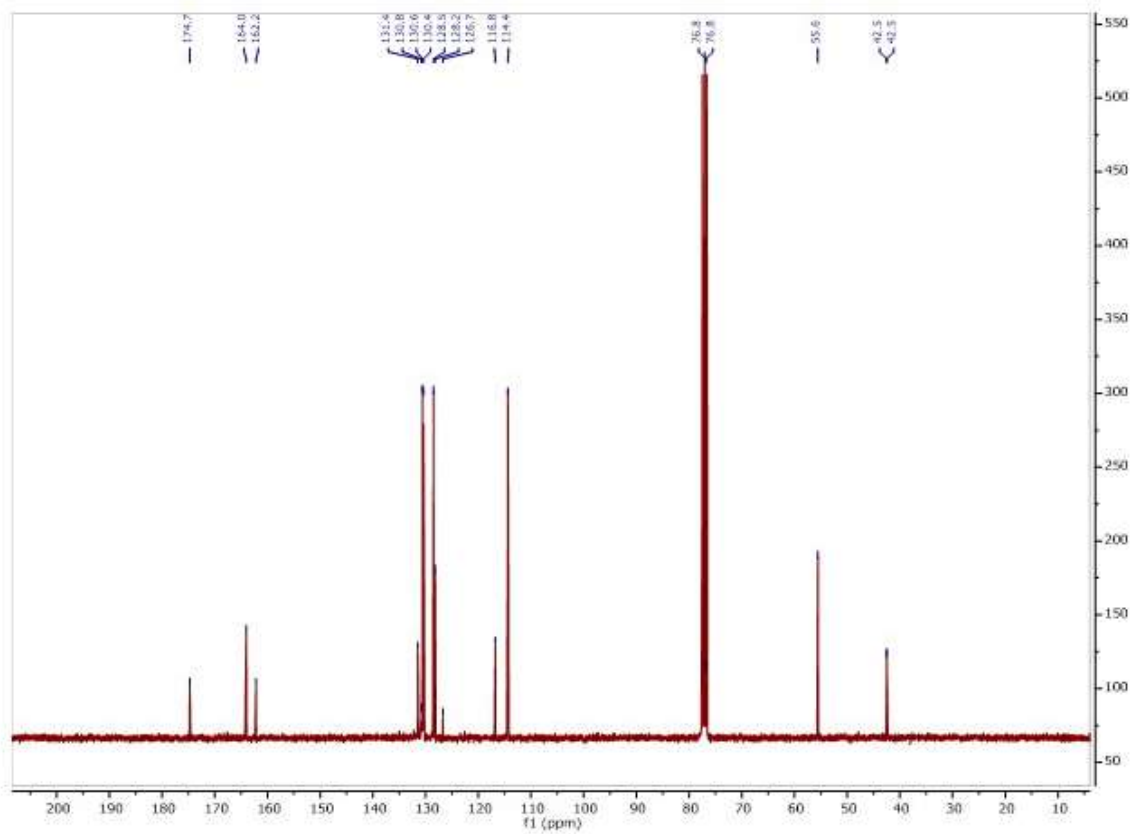

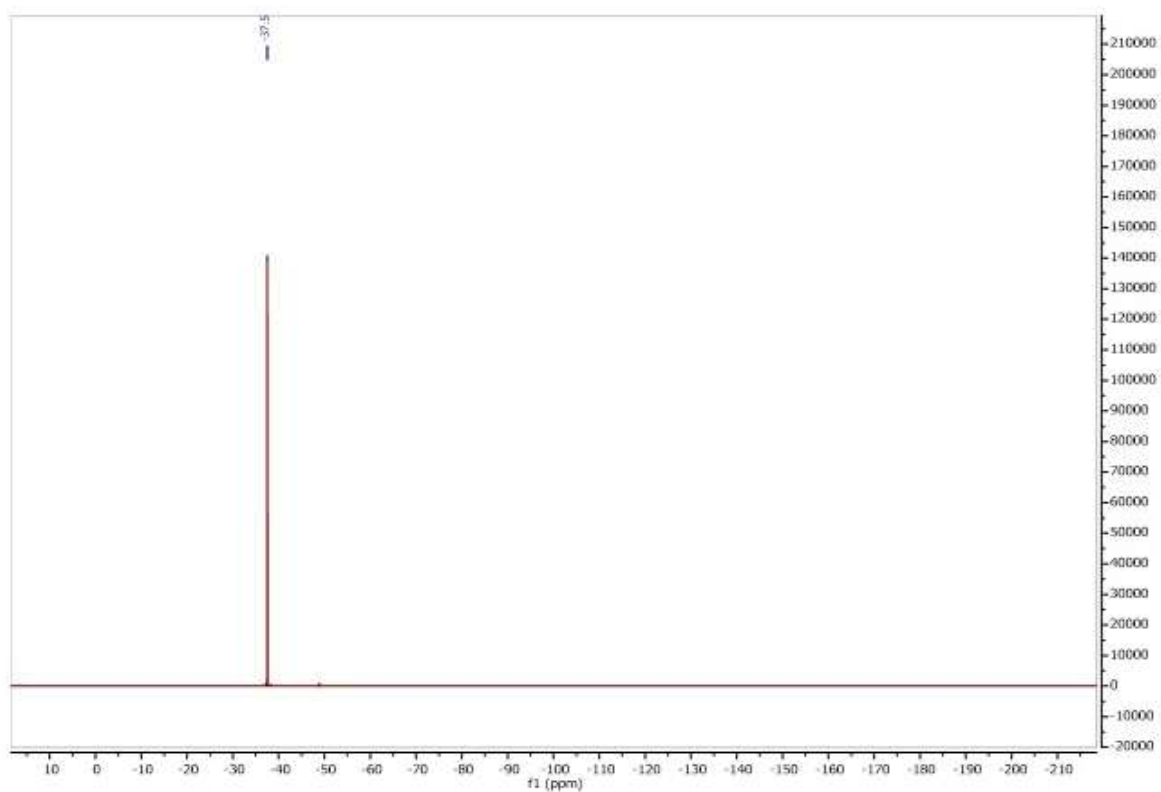

**2-(4-methoxyphenyl)-4-(naphthalen-2-ylmethyl)-4-((trifluoromethyl)-thio)oxazol-5(4H)-one (3f)**

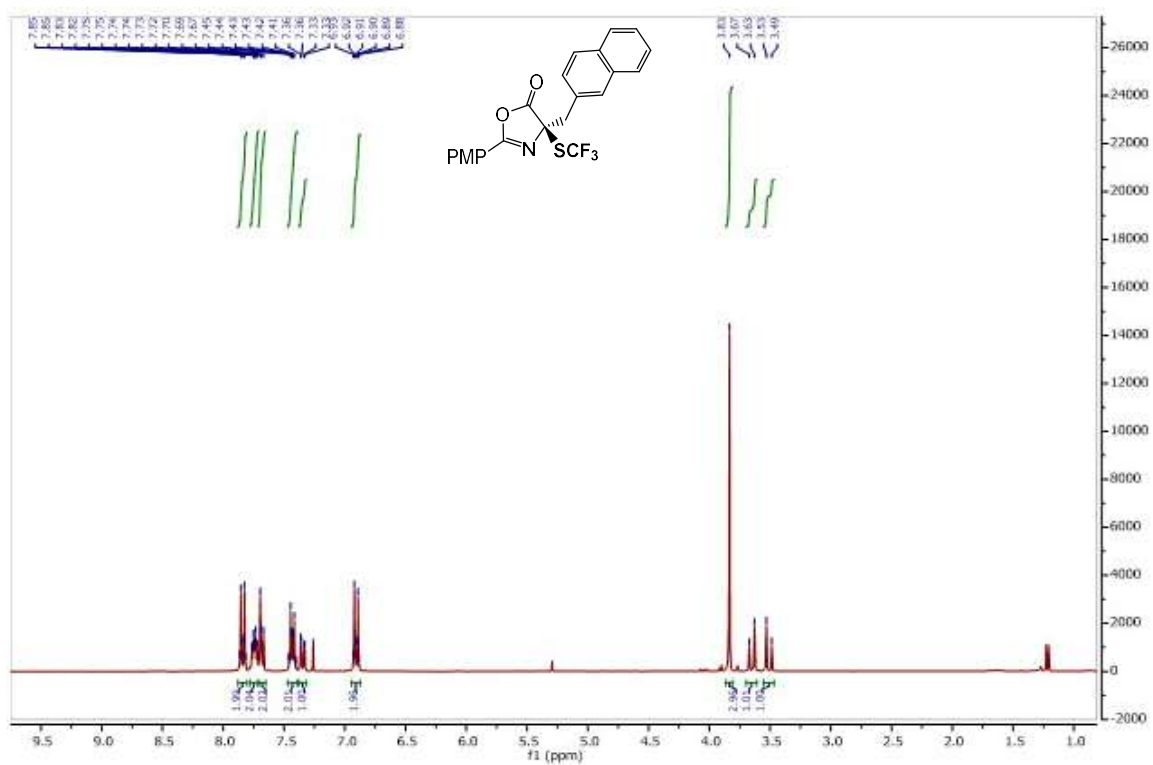

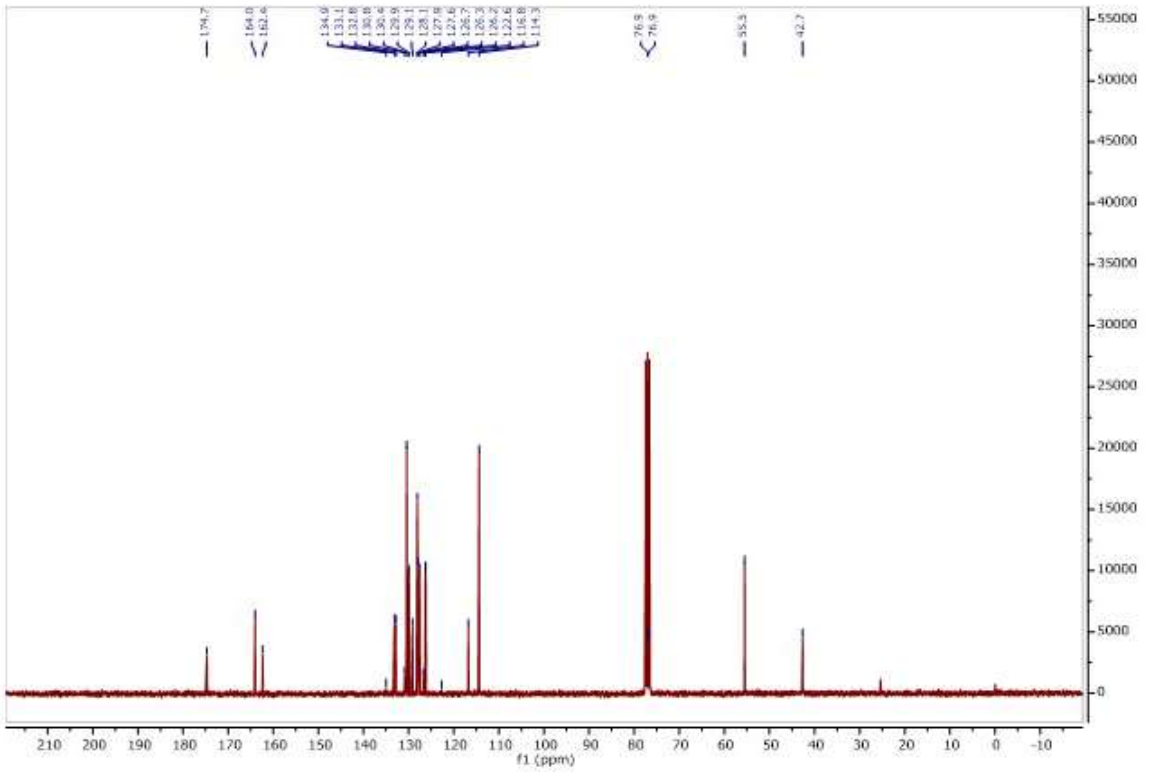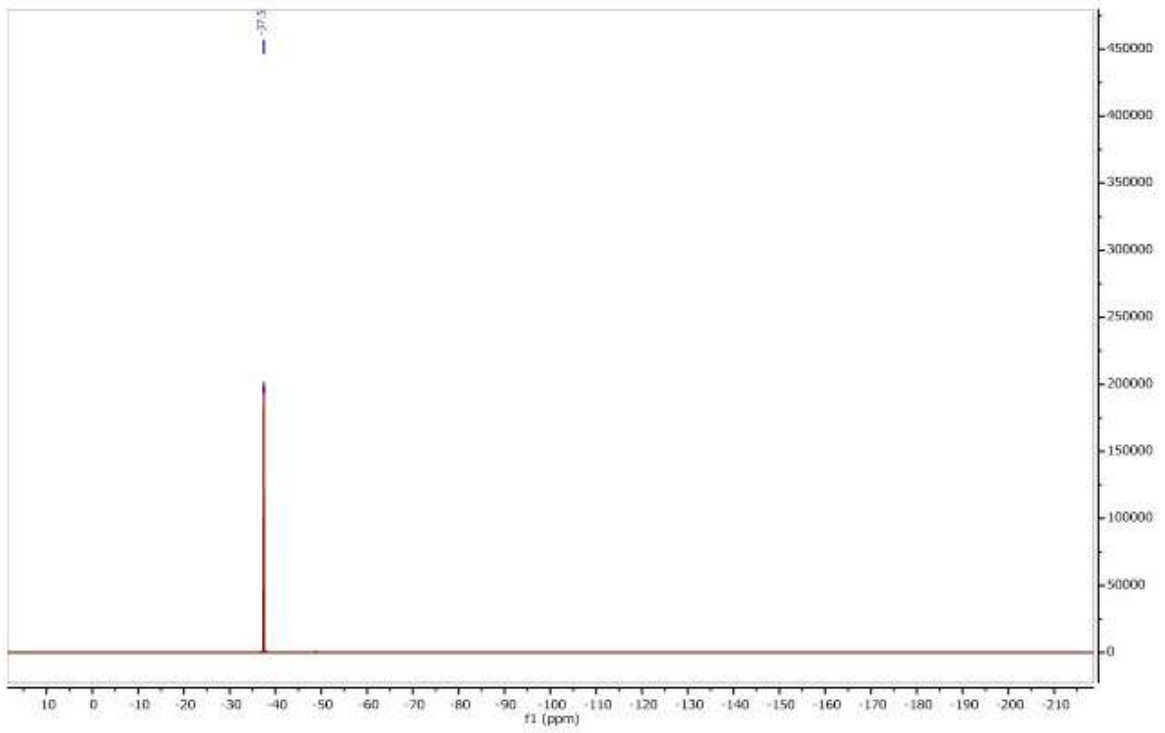

4-benzyl-2-(3,5-dimethoxyphenyl)-4-((trifluoromethyl)thio)oxazol-5(4H)-one (3g)

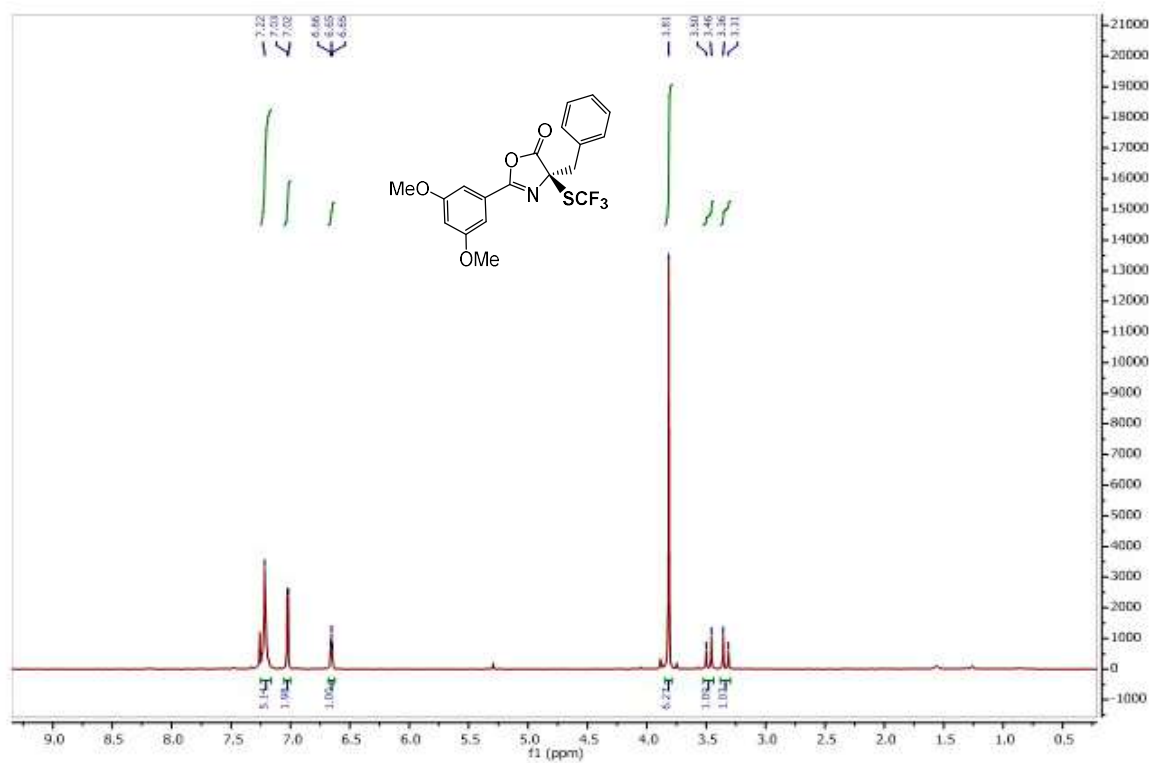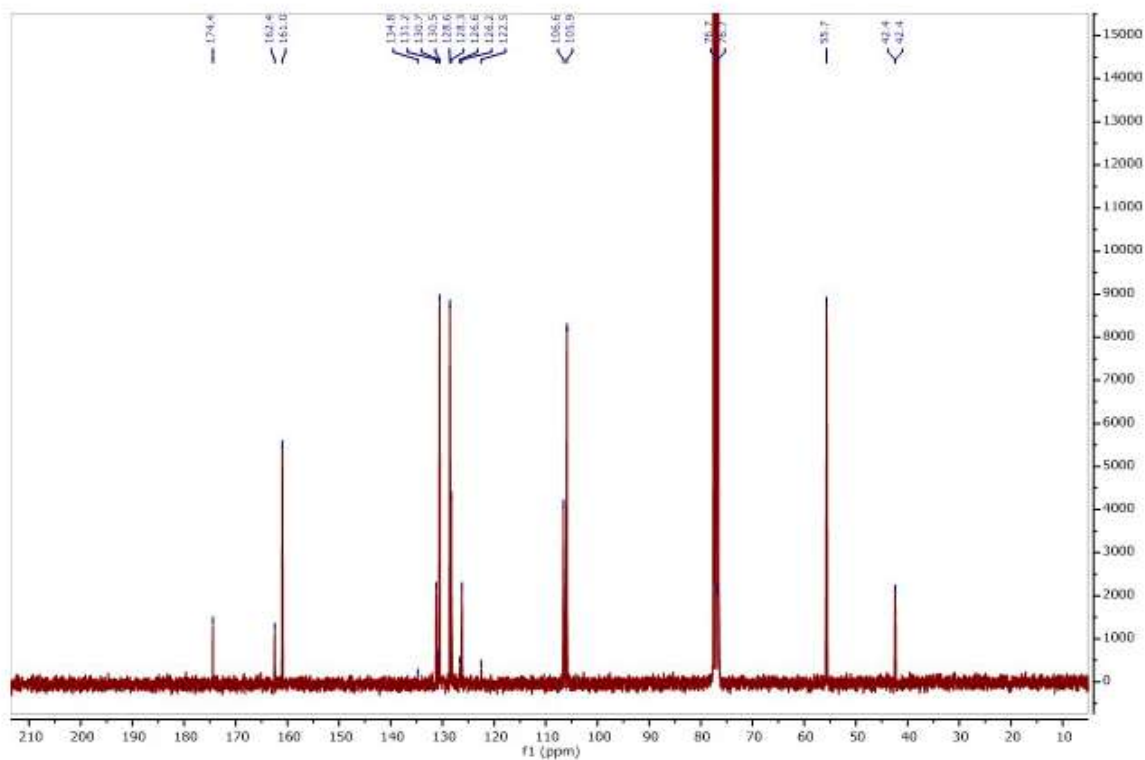



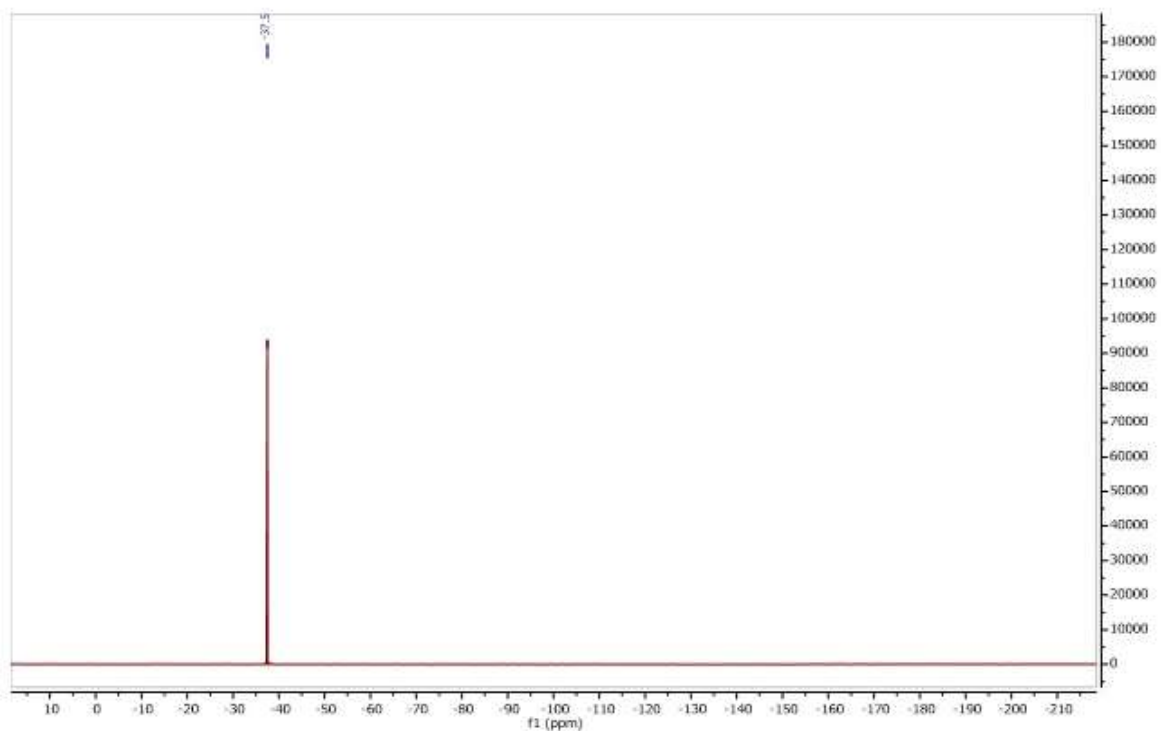

4-(3,4-dimethoxybenzyl)-2-(4-methoxyphenyl)-4-((trifluoromethyl)thio)oxazol-5(4H)-one (3h)

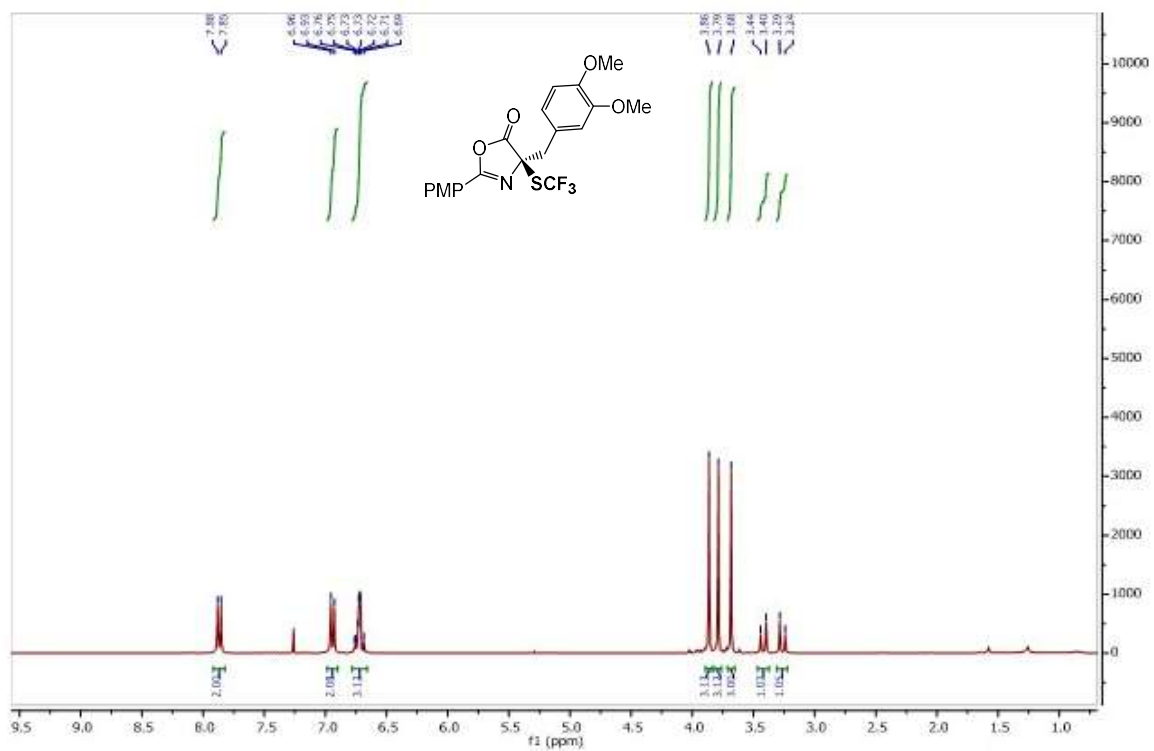

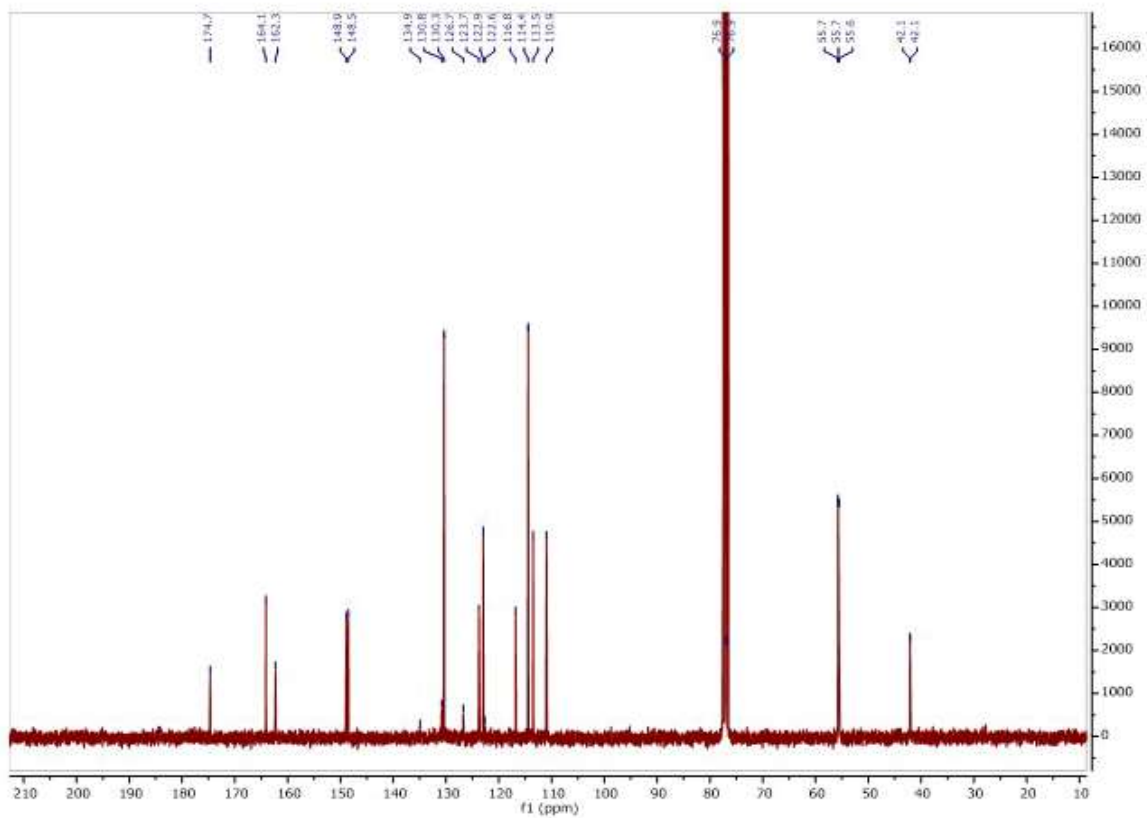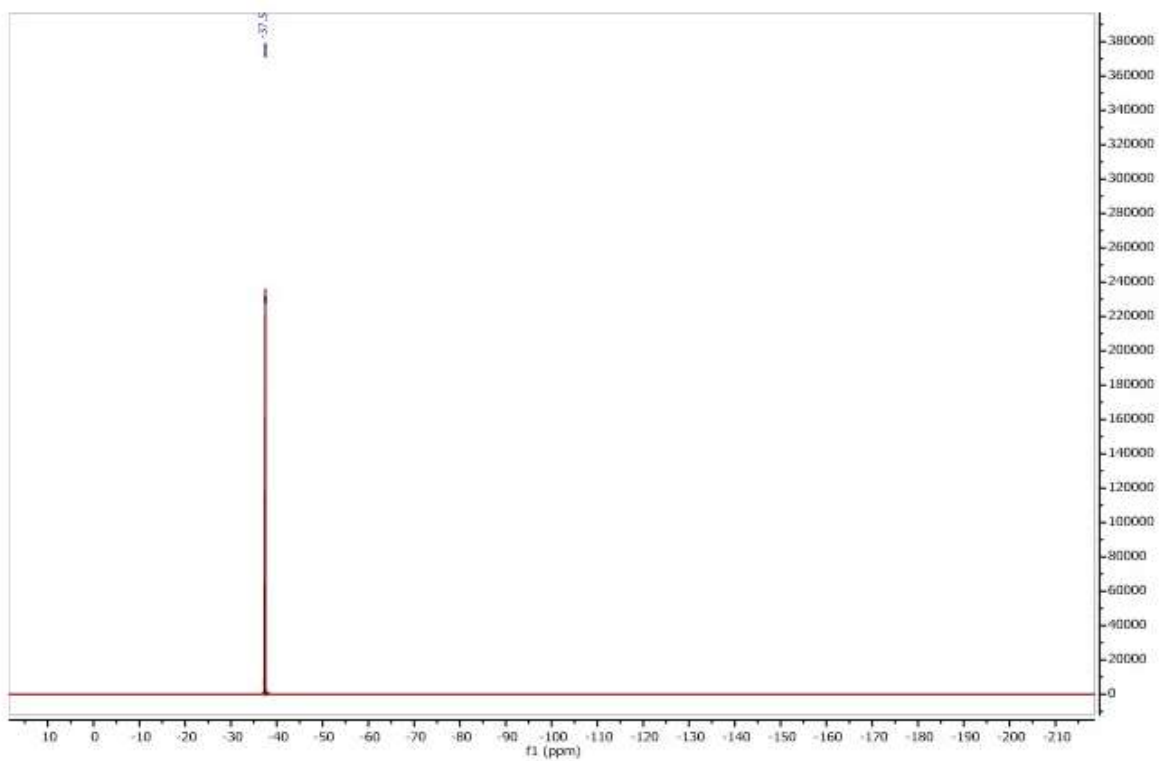

4-(3,4-dichlorobenzyl)-2-(4-methoxyphenyl)-4-(trifluoromethyl)-thiooxazol-5(4H)-one (3i)

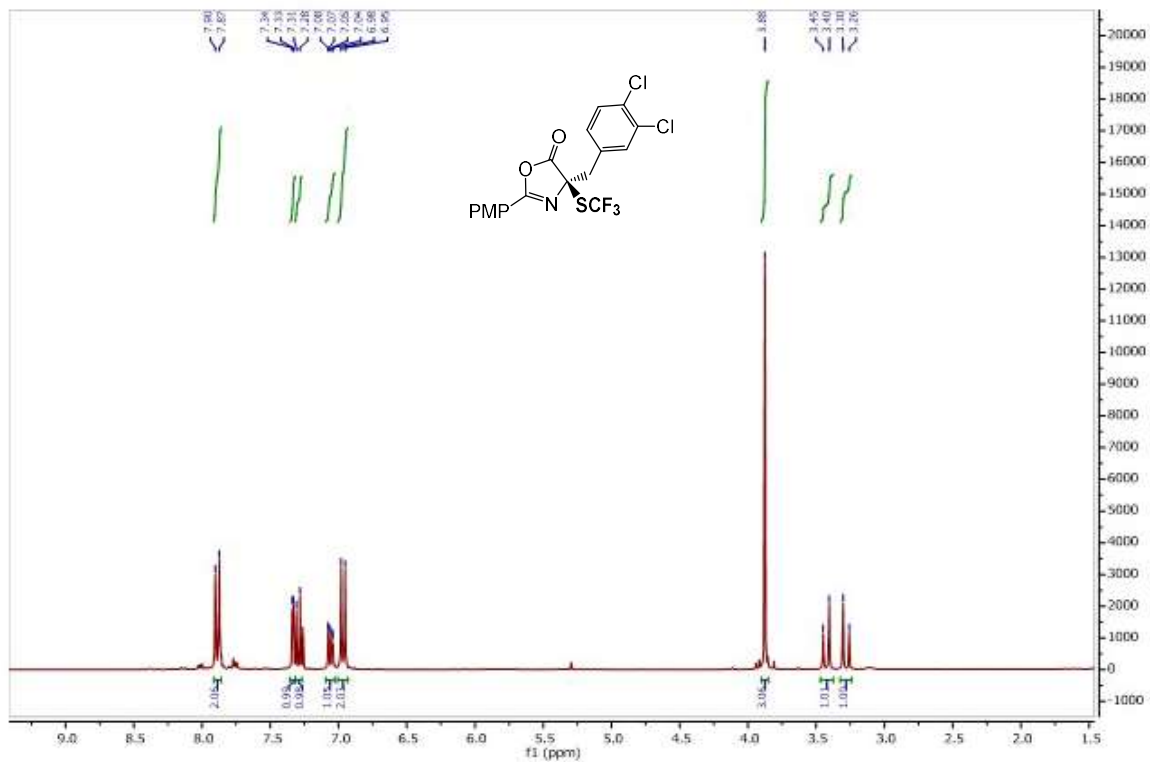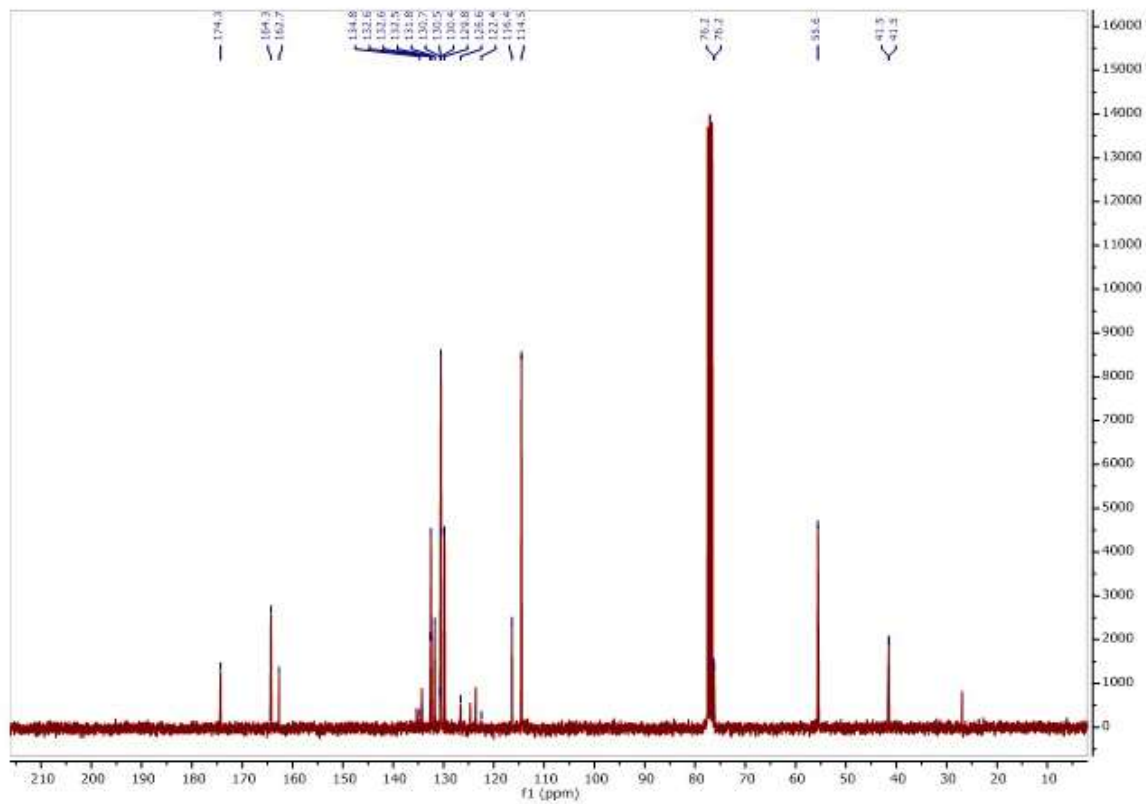

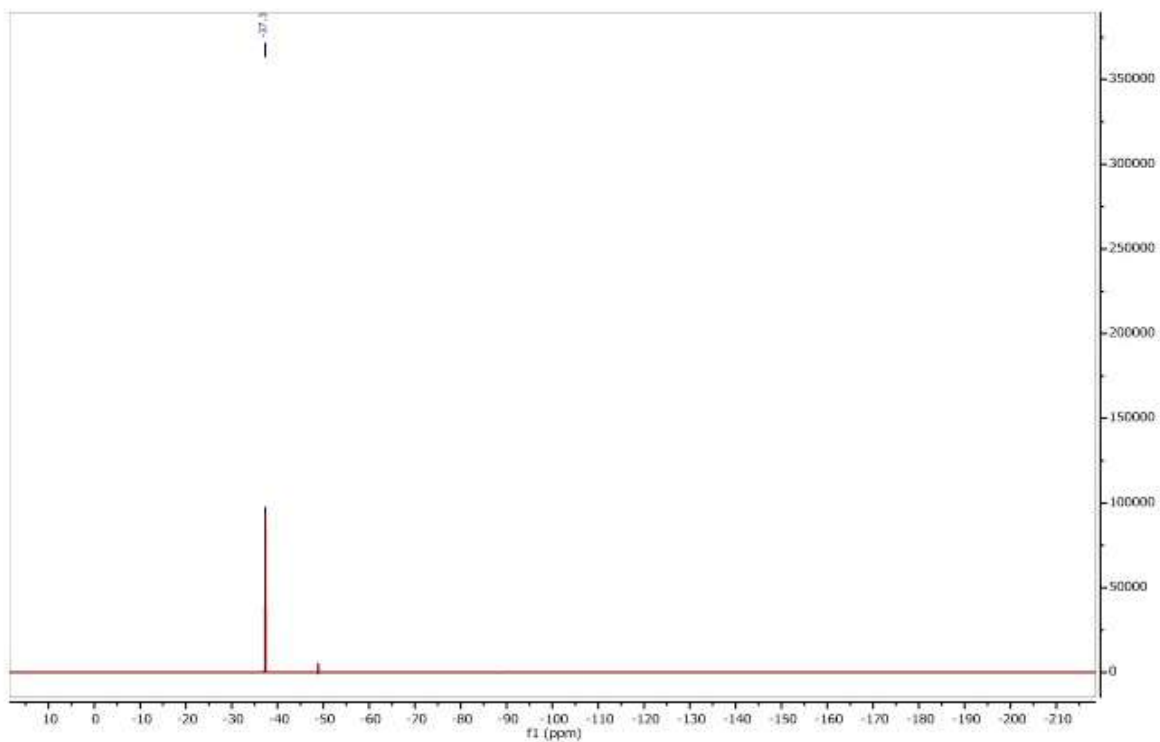

4-(4-chlorobenzyl)-2-(4-methoxyphenyl)-4-(trifluoromethyl)thiooxazol-5(4H)-one (3j)

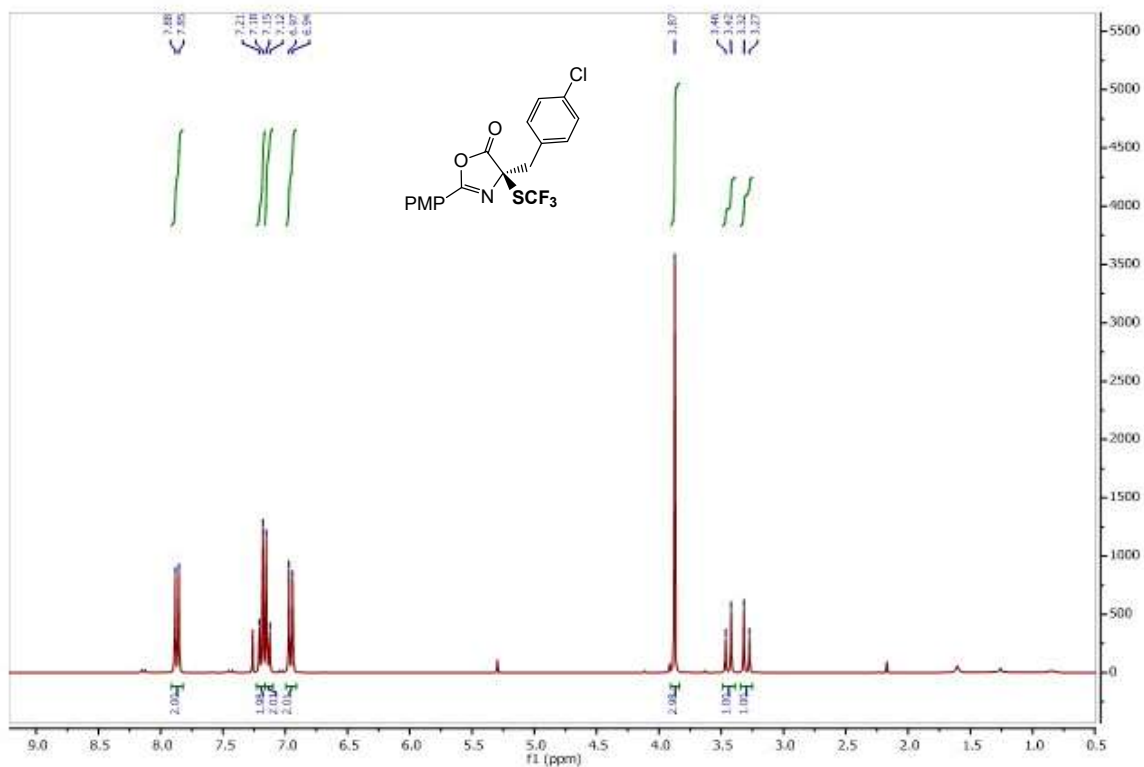

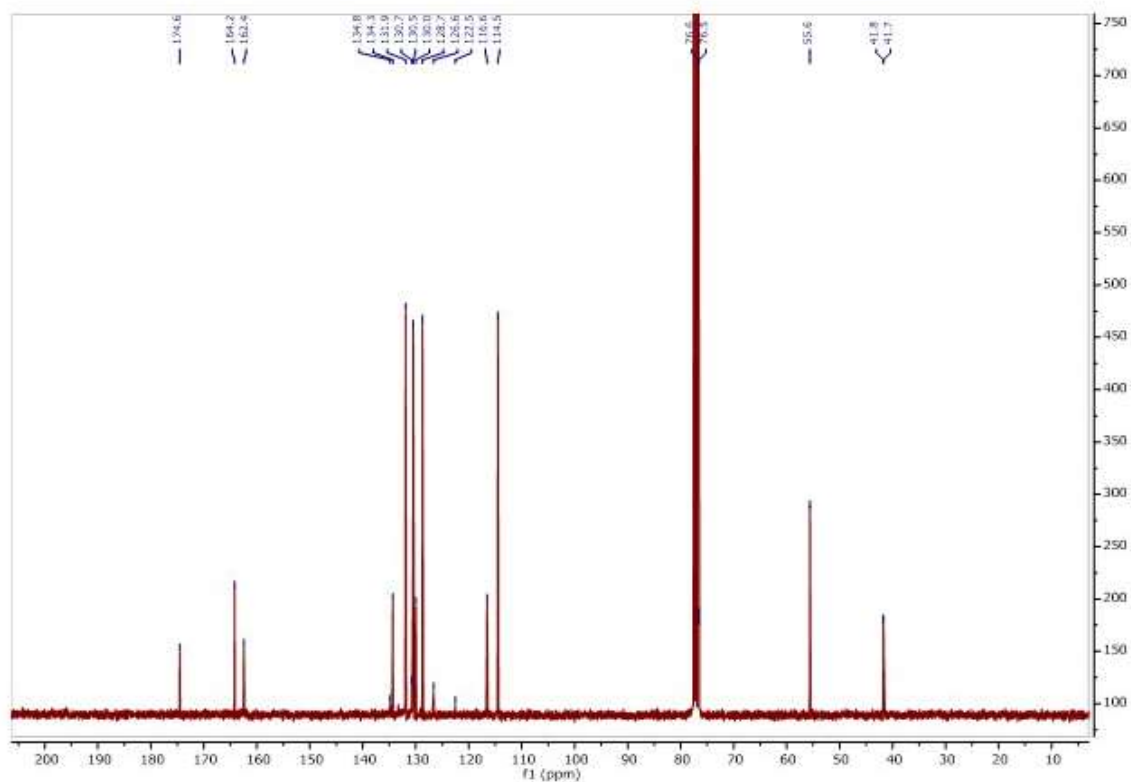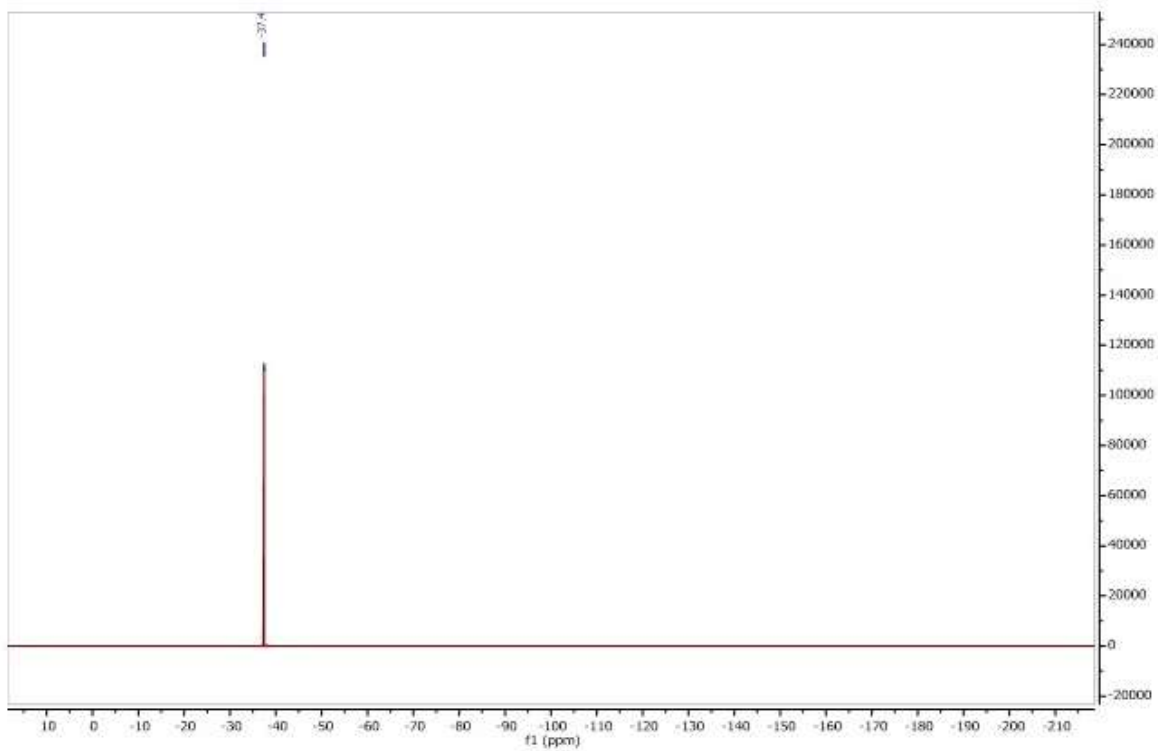

2-(4-methoxyphenyl)-4-phenethyl-4-((trifluoromethyl)thio)oxazol-5(4H)-one (3k)

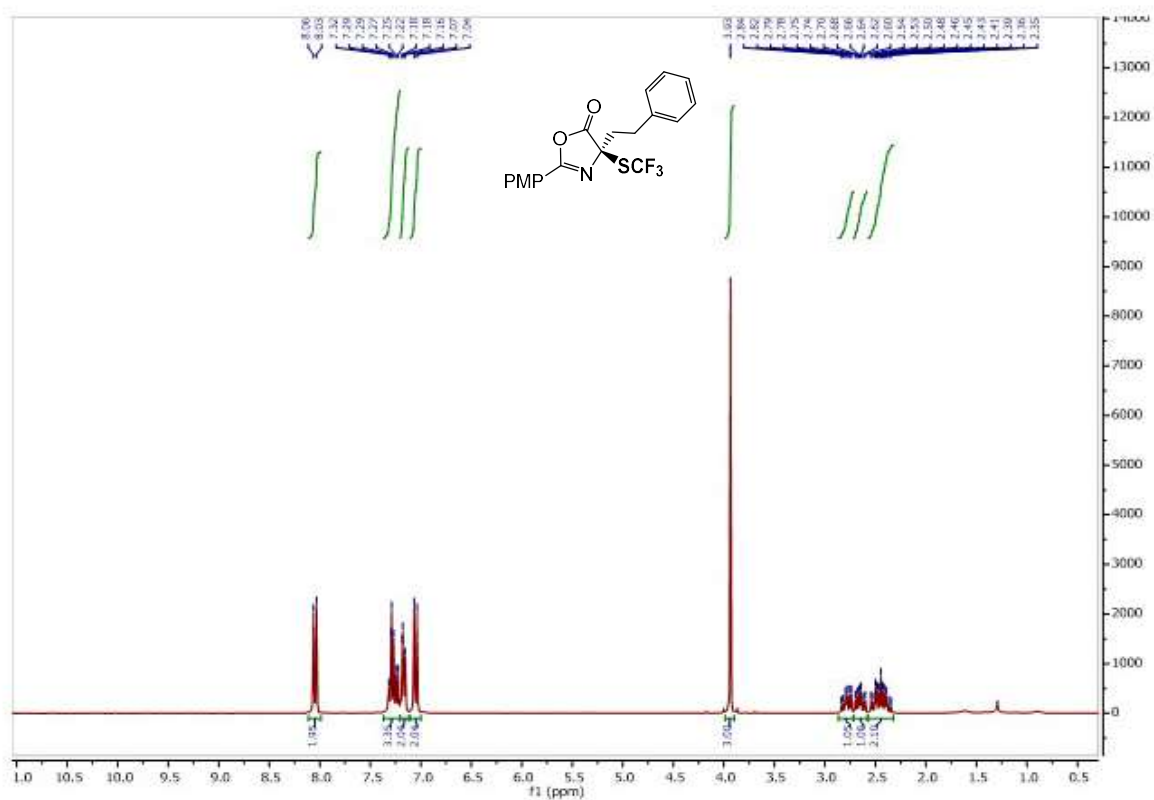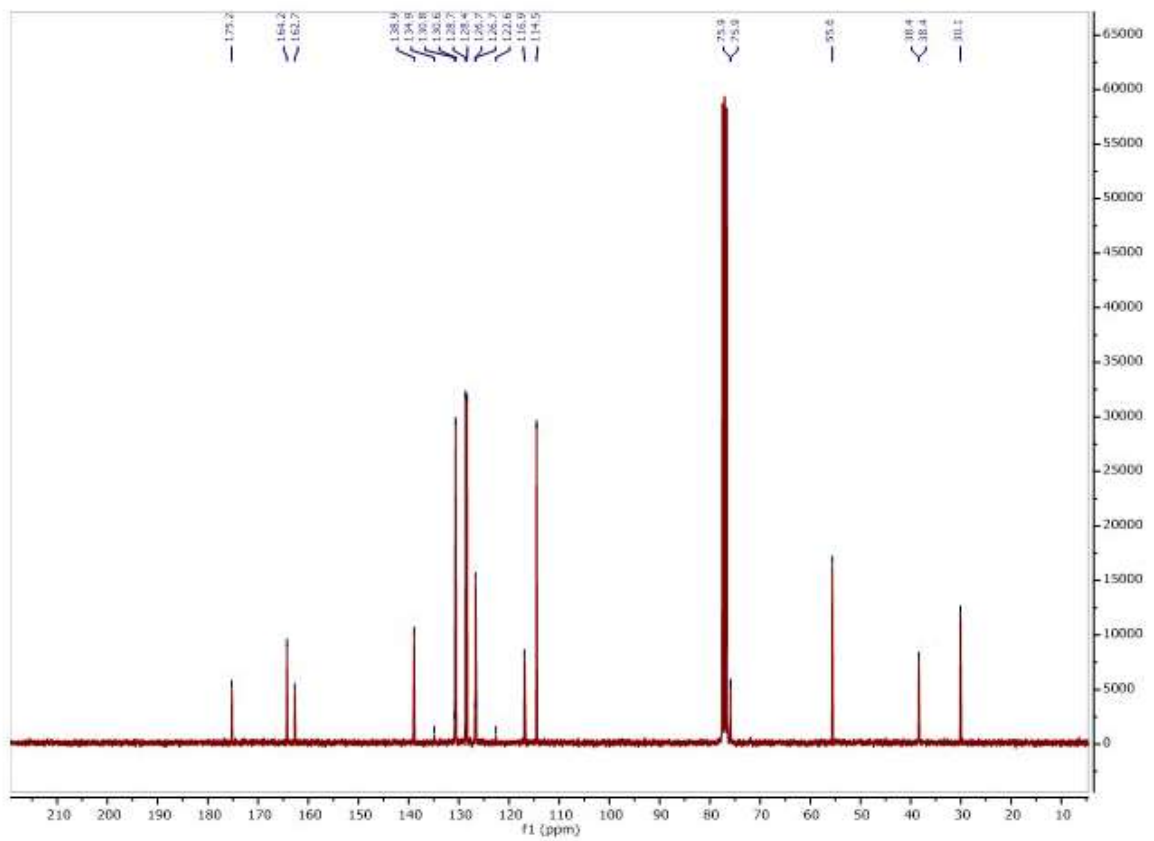

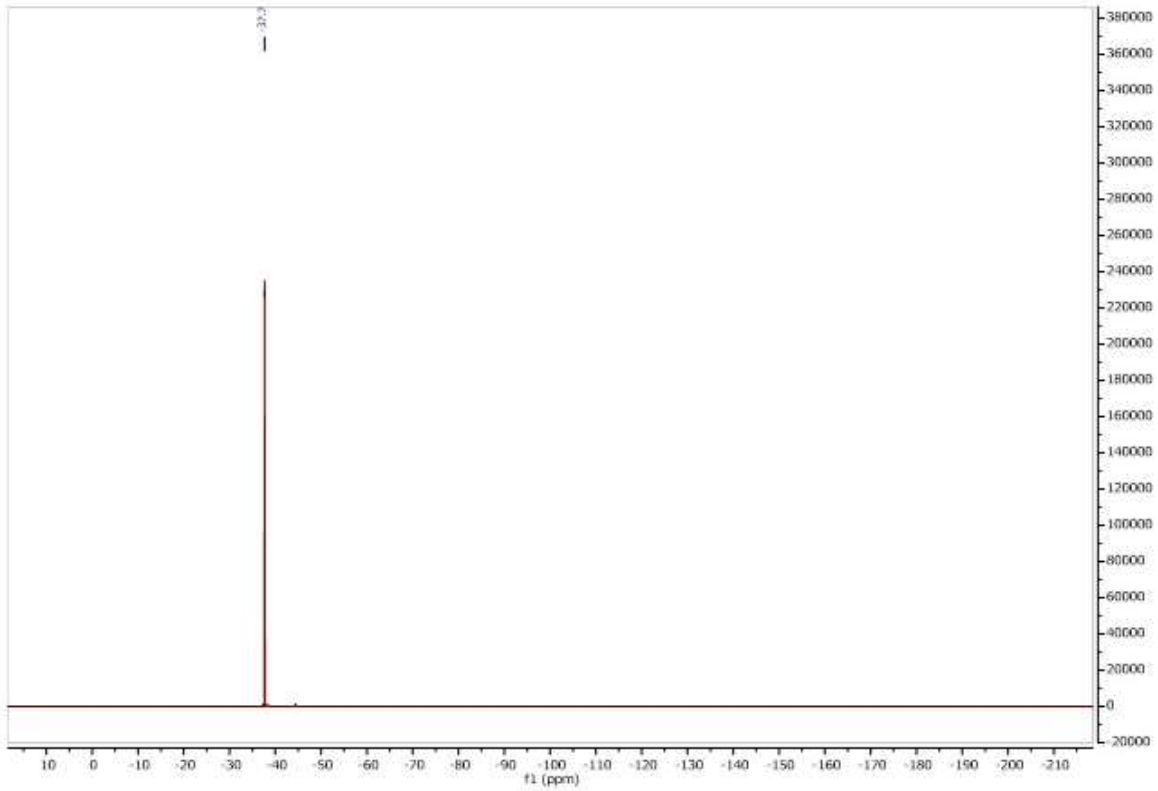

**2-(4-methoxyphenyl)-4-(2-(ethylthio)ethyl)-4-((trifluoromethyl)thio)oxazol-5(4H)-one (31)**

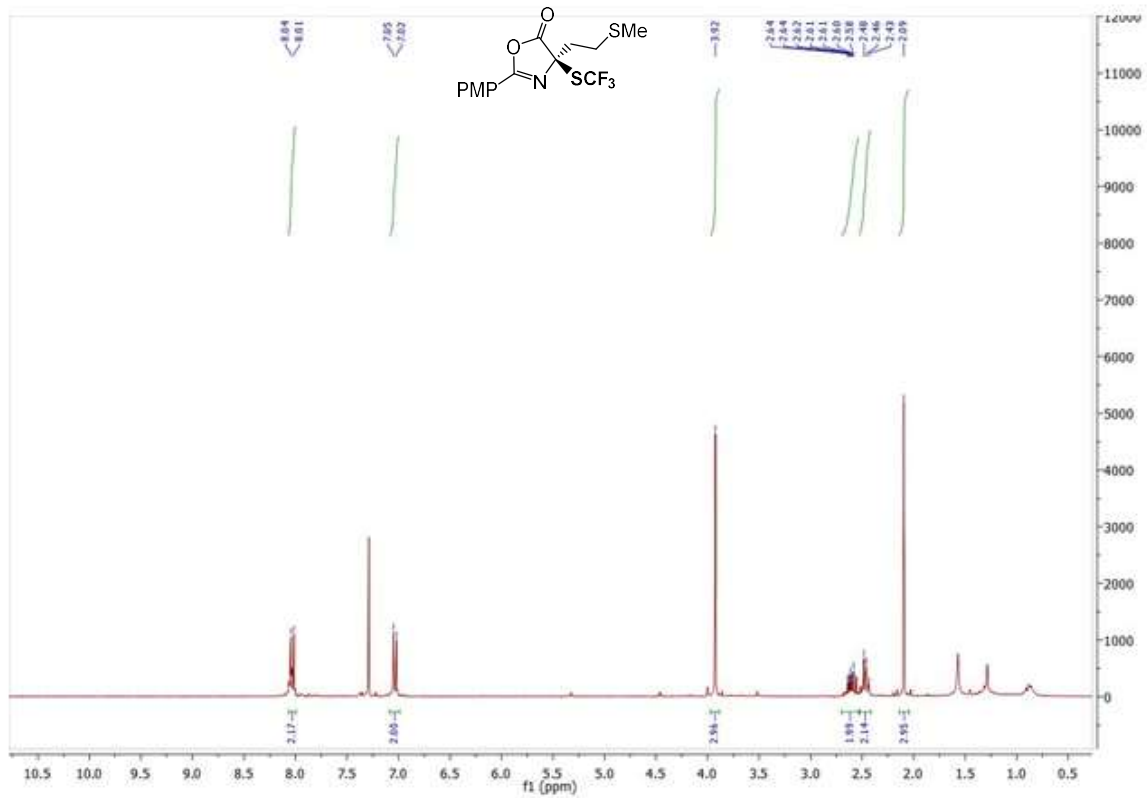

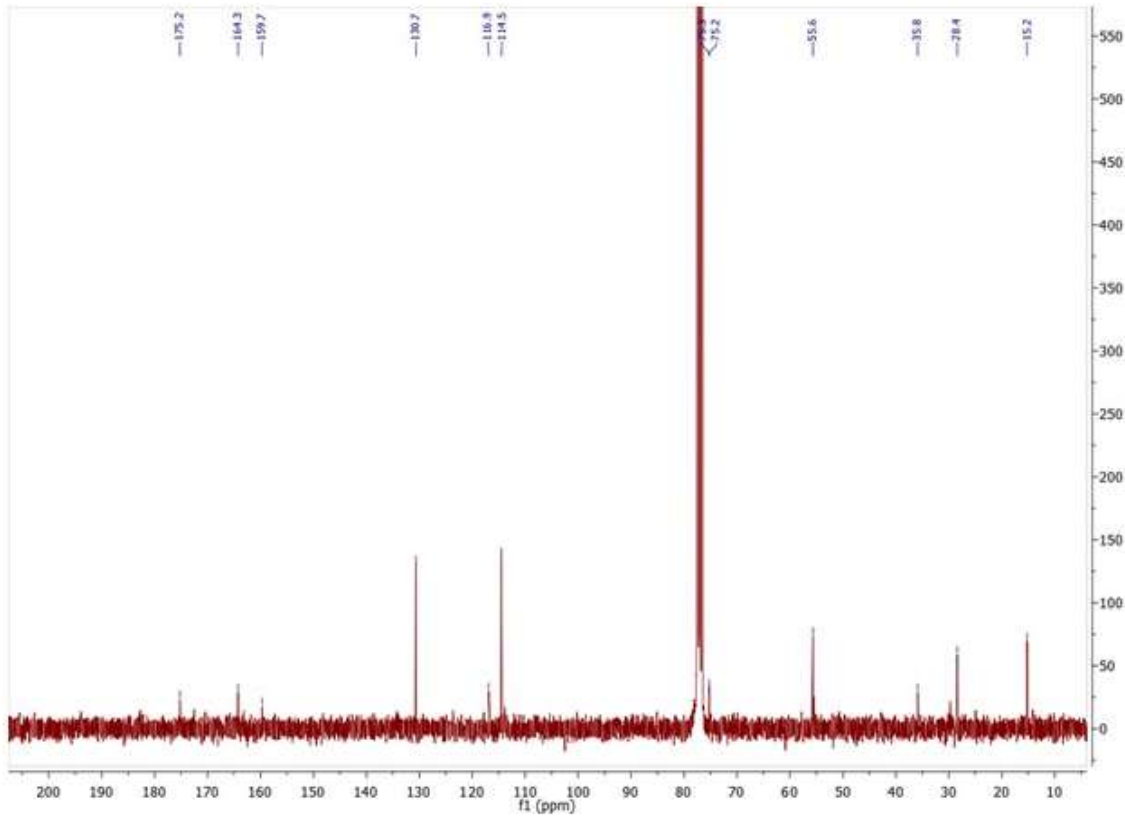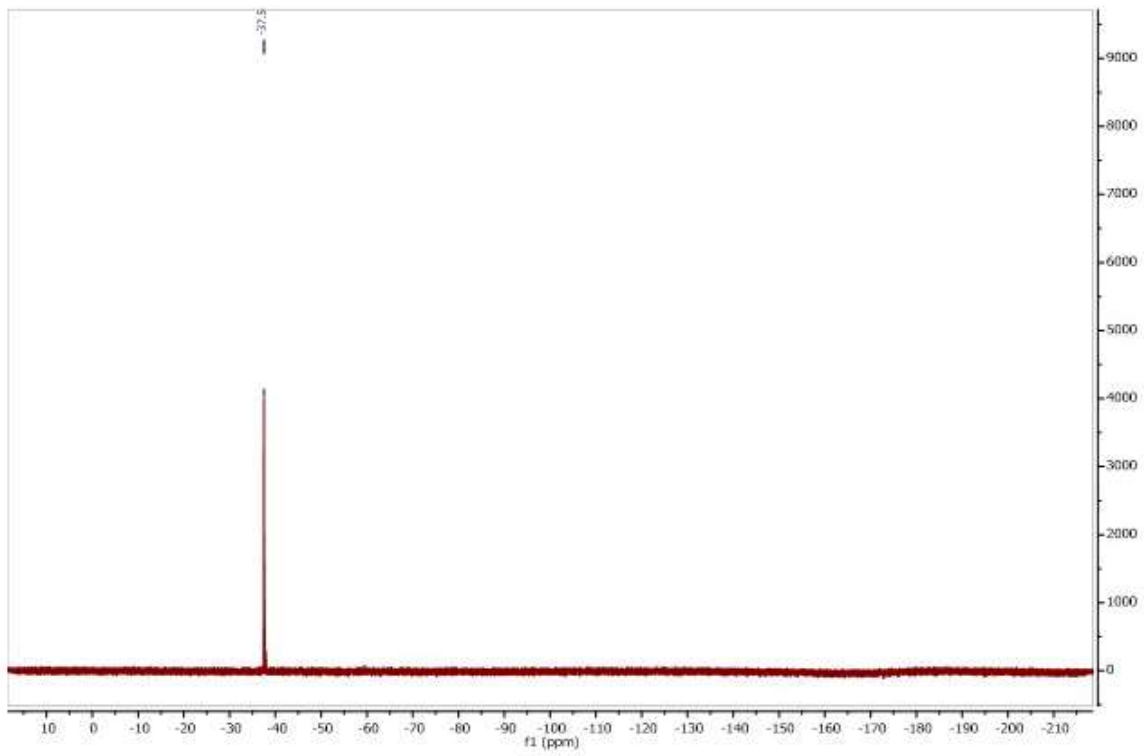



4-(cyclohexylmethyl)-2-(4-methoxyphenyl)-4-((trifluoromethyl)thio)oxazol-5(4H)-one (3m)

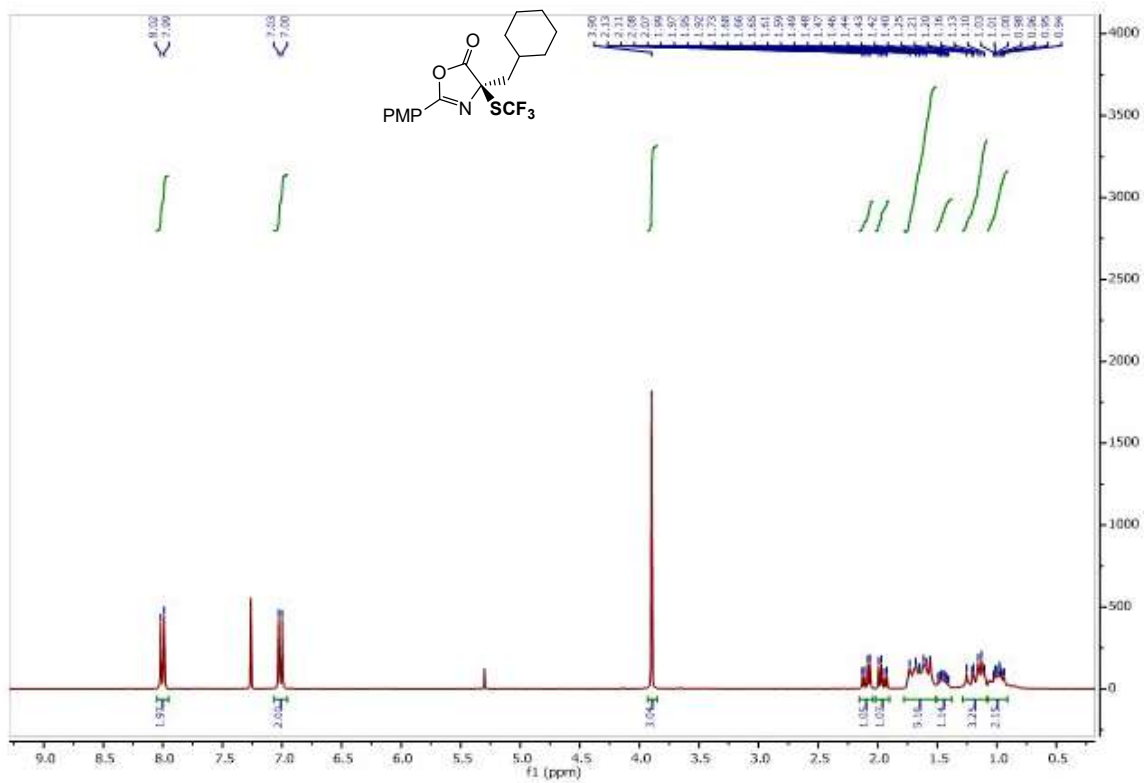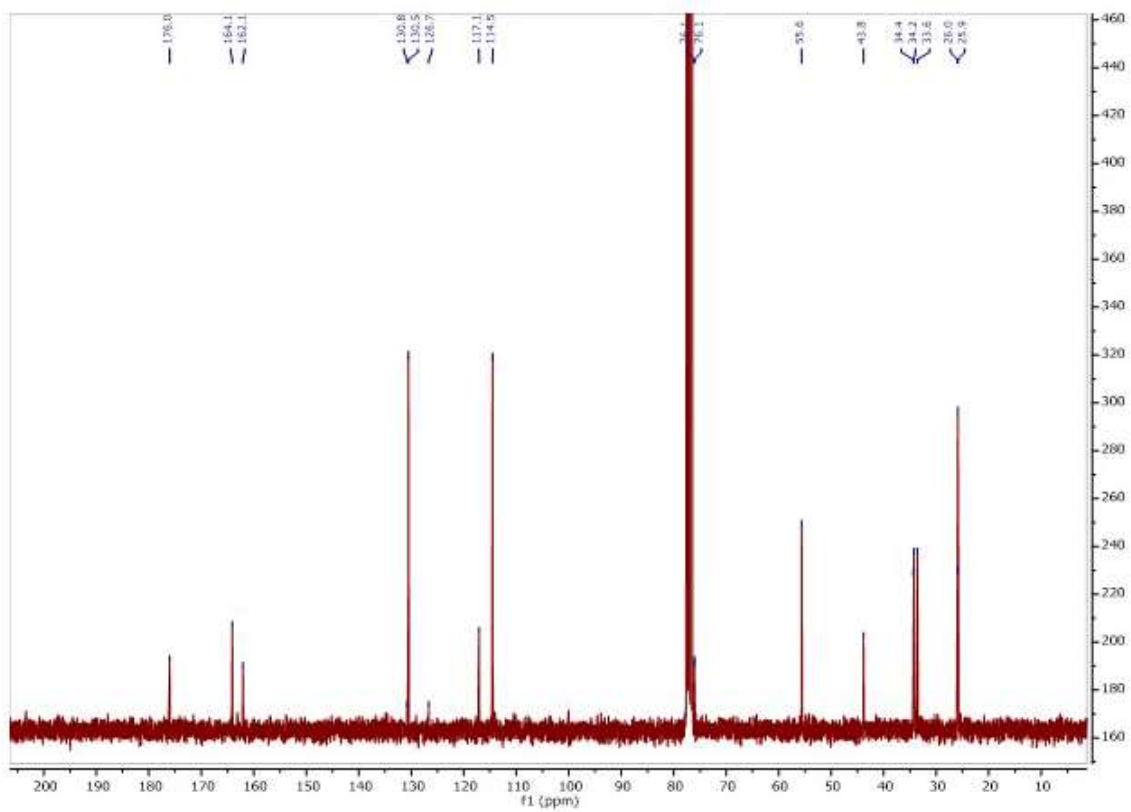

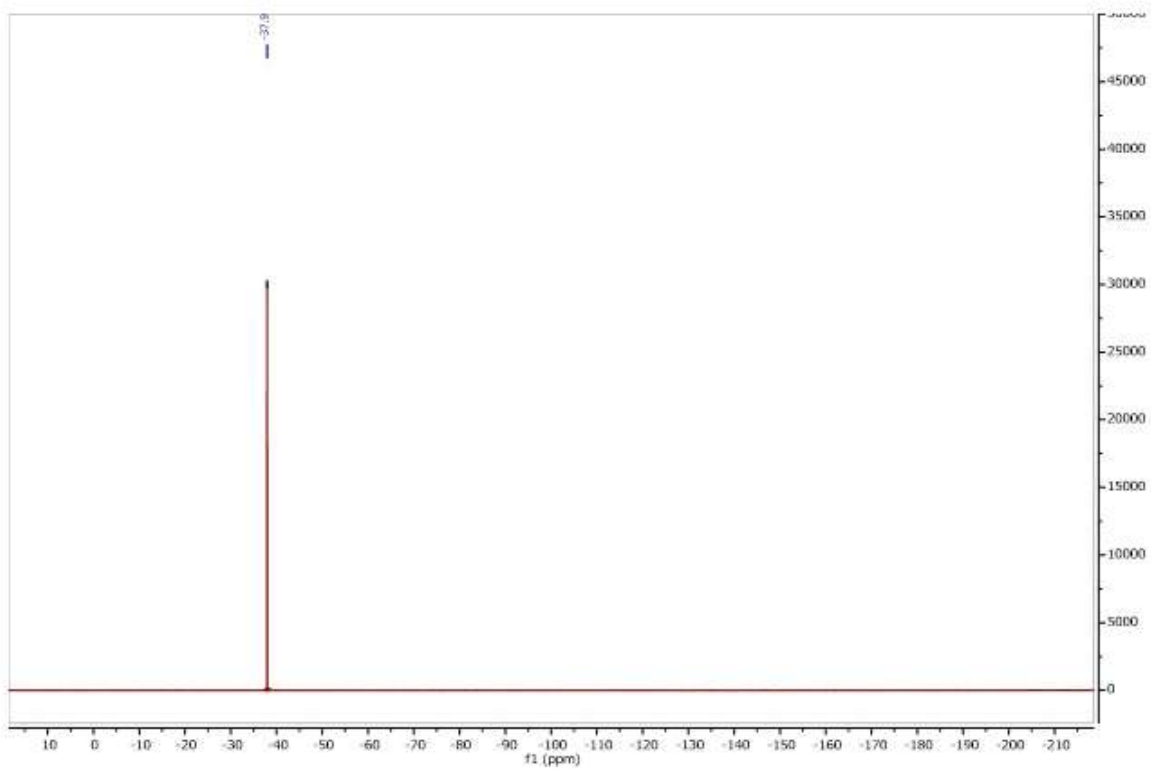

**4-isobutyl-2-(4-methoxyphenyl)-4-((trifluoromethyl)thio)oxazol-5(4H)-one (3n)**

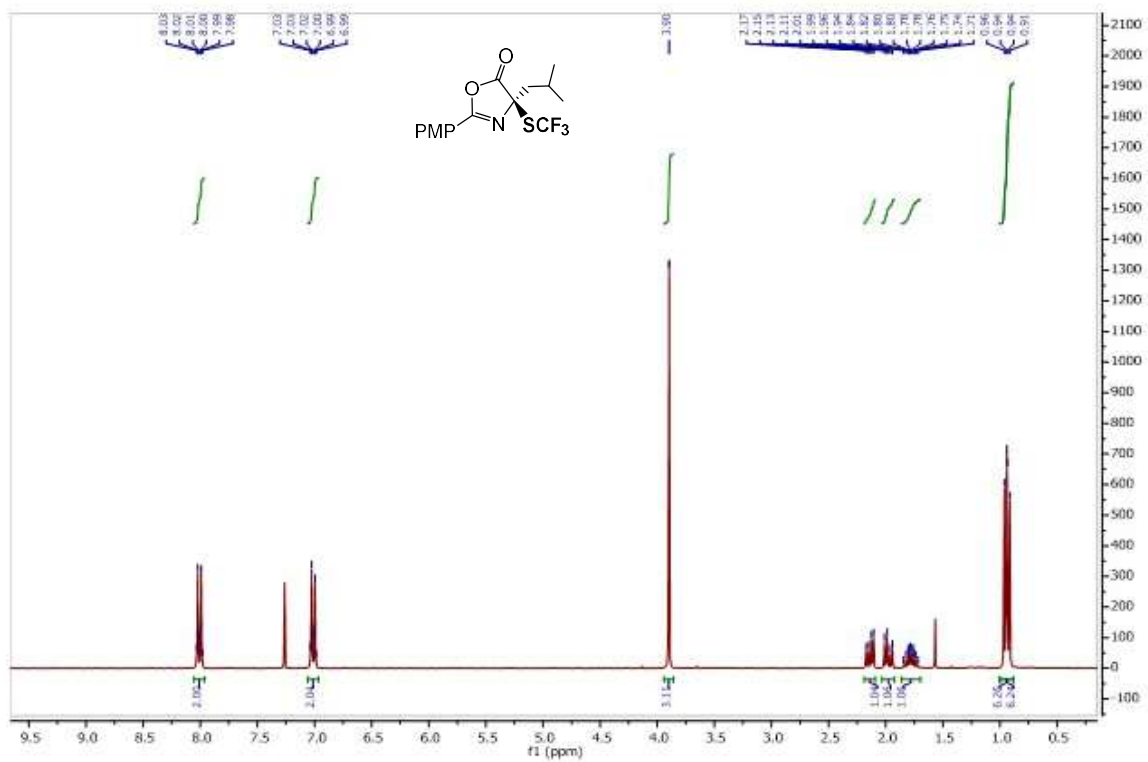

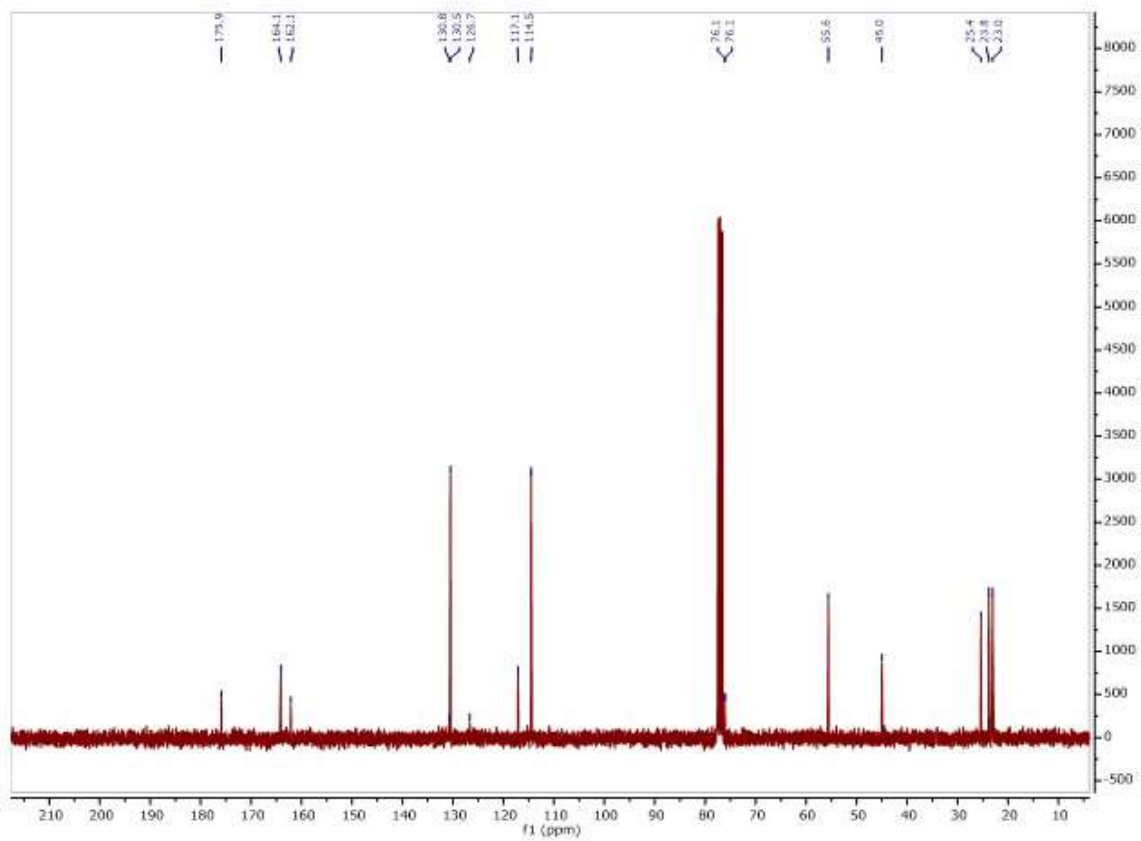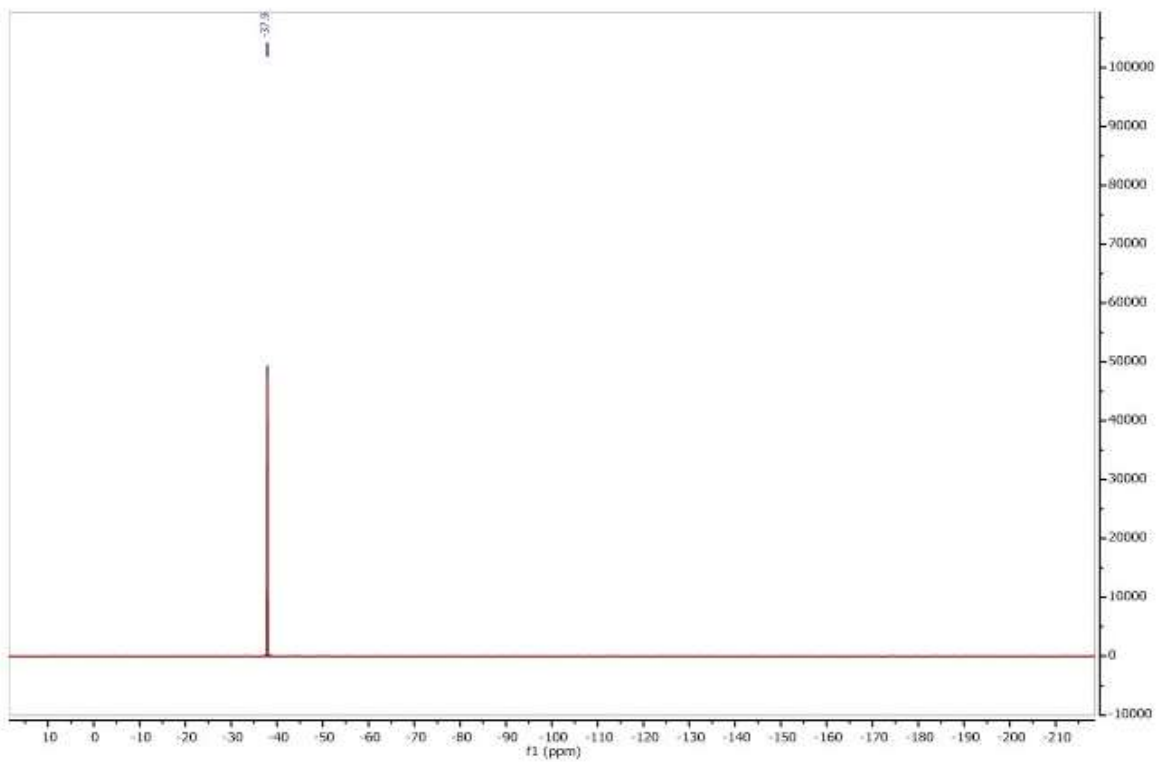

4-isopropyl-2-(4-methoxyphenyl)-4-((trifluoromethyl)thio)oxazol-5(4H)-one (3o)

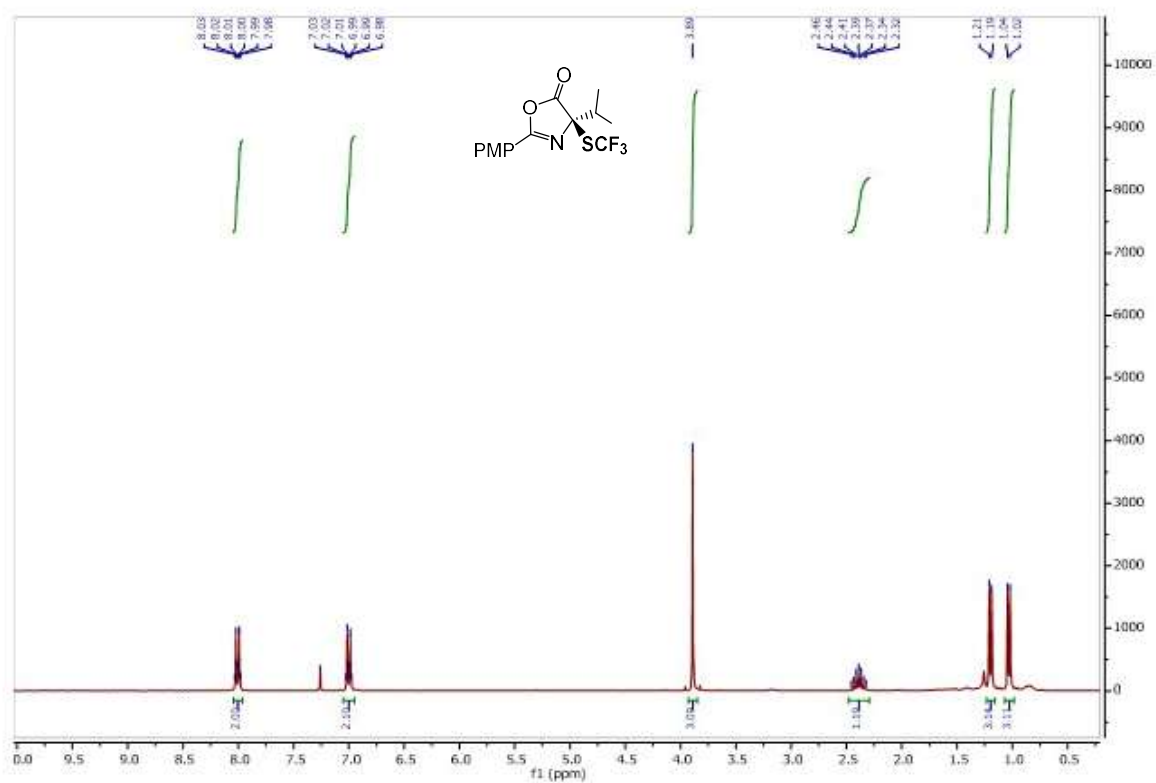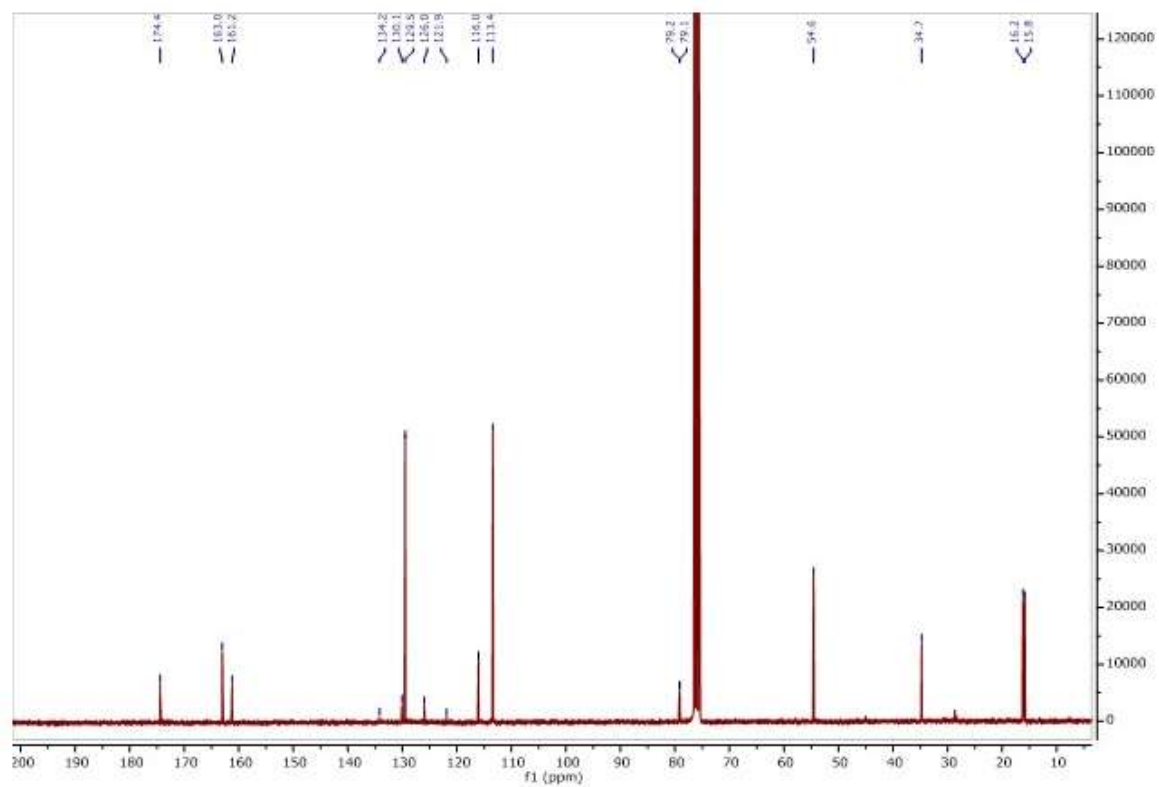

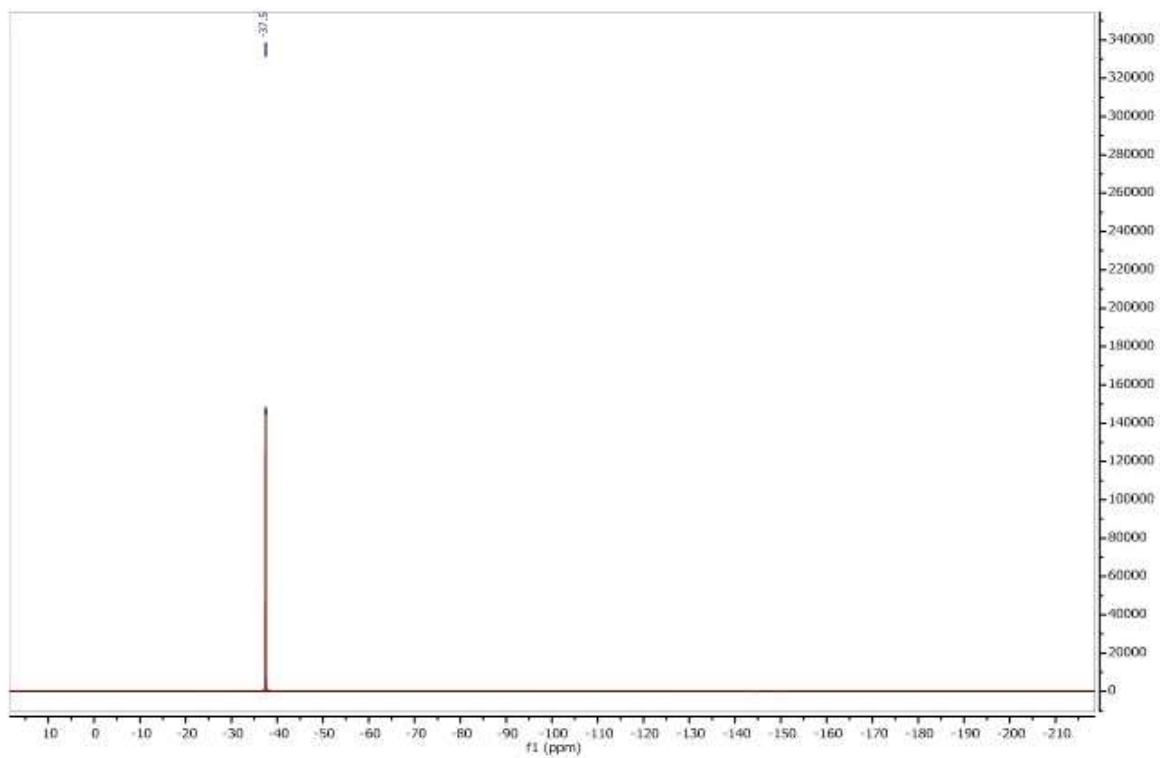

4-benzyl-2-phenyl-4-((trifluoromethyl)thio)oxazol-5(4H)-one (3a)

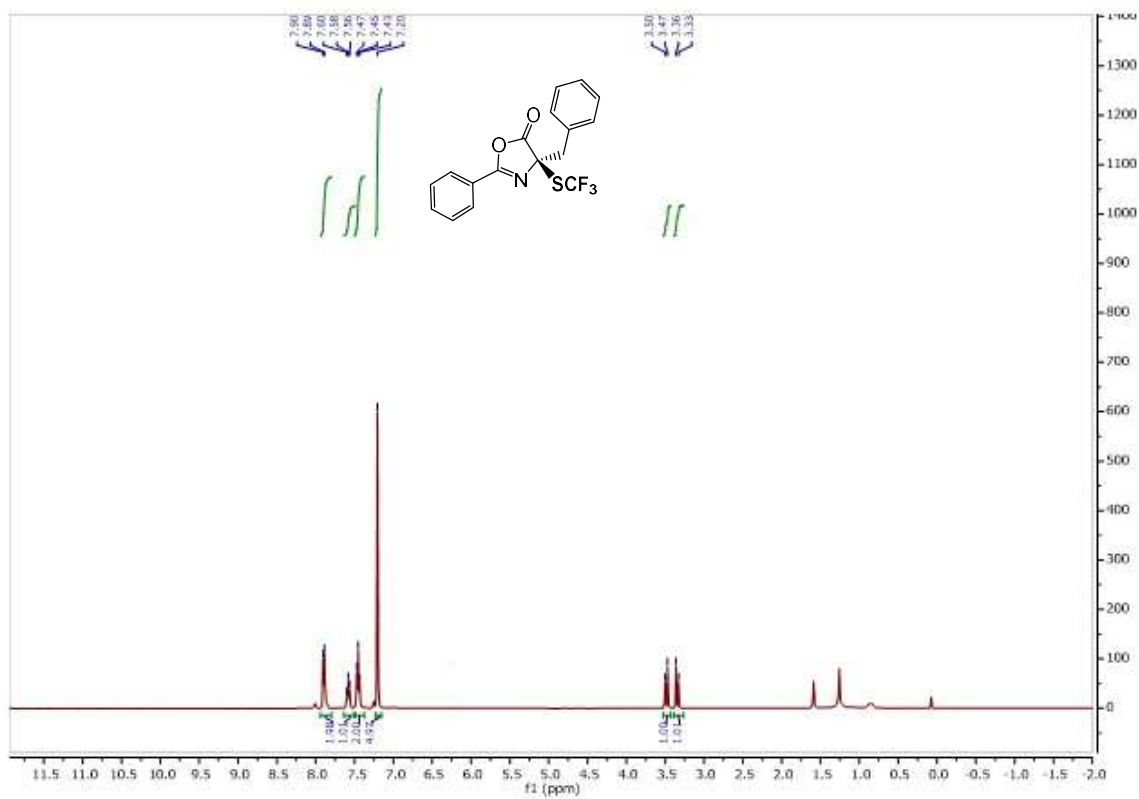

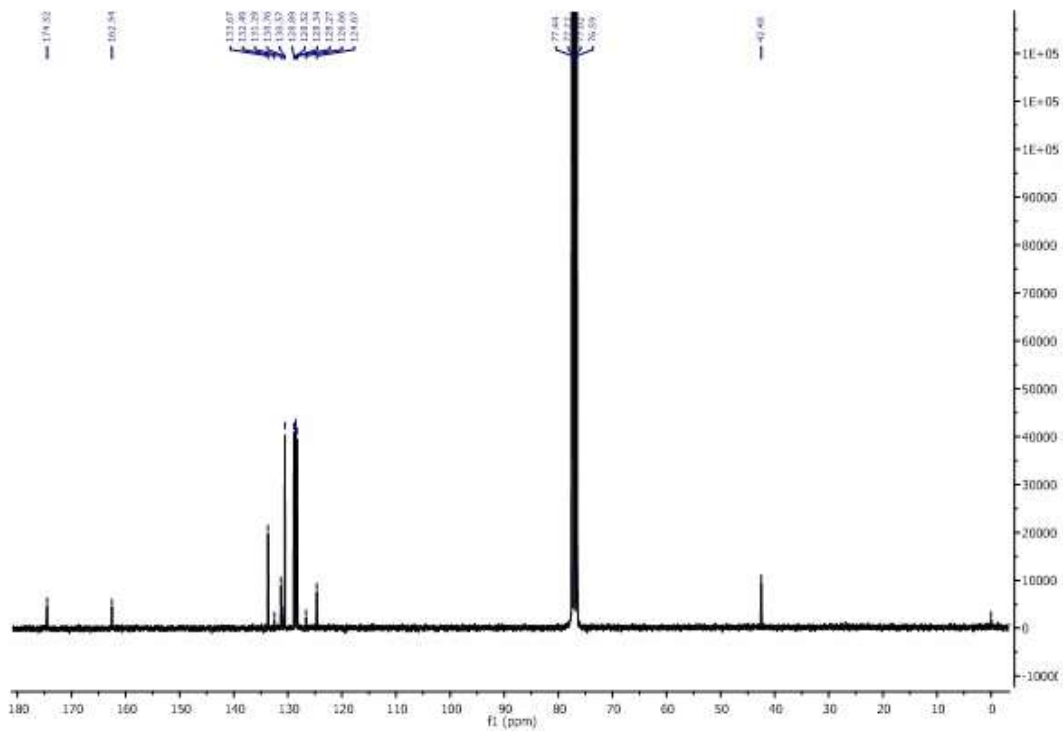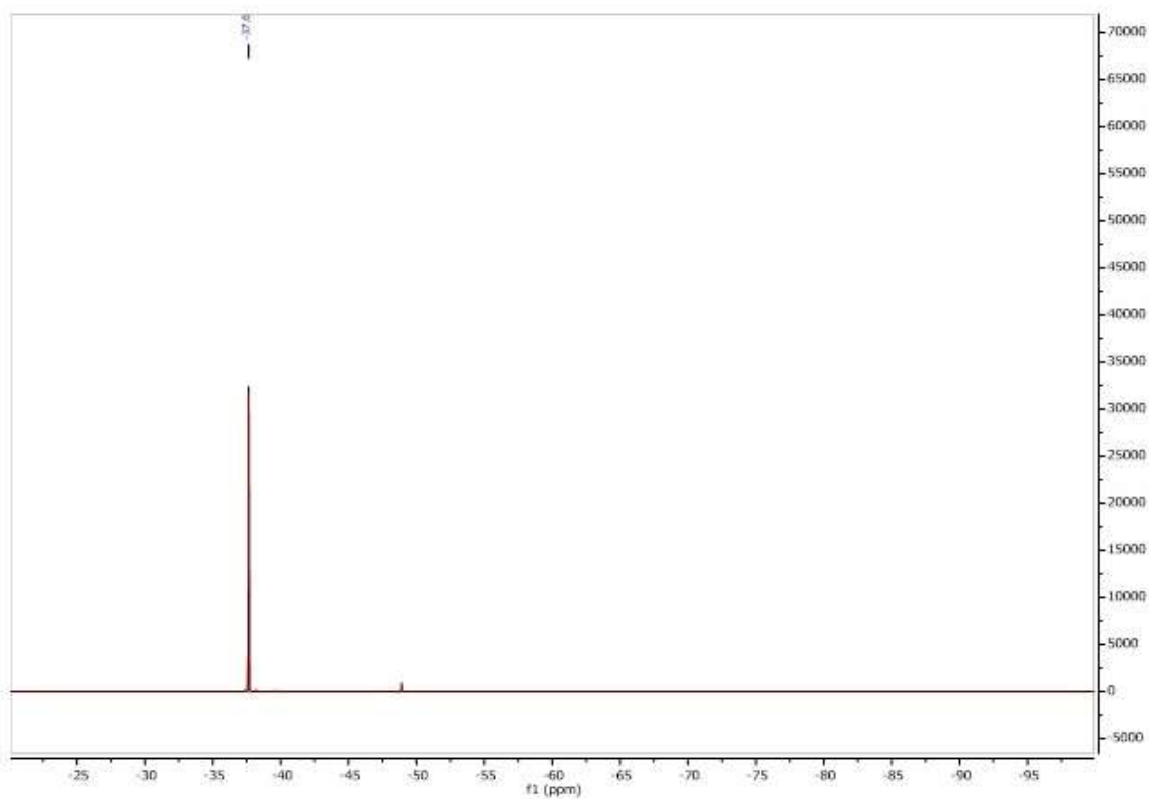



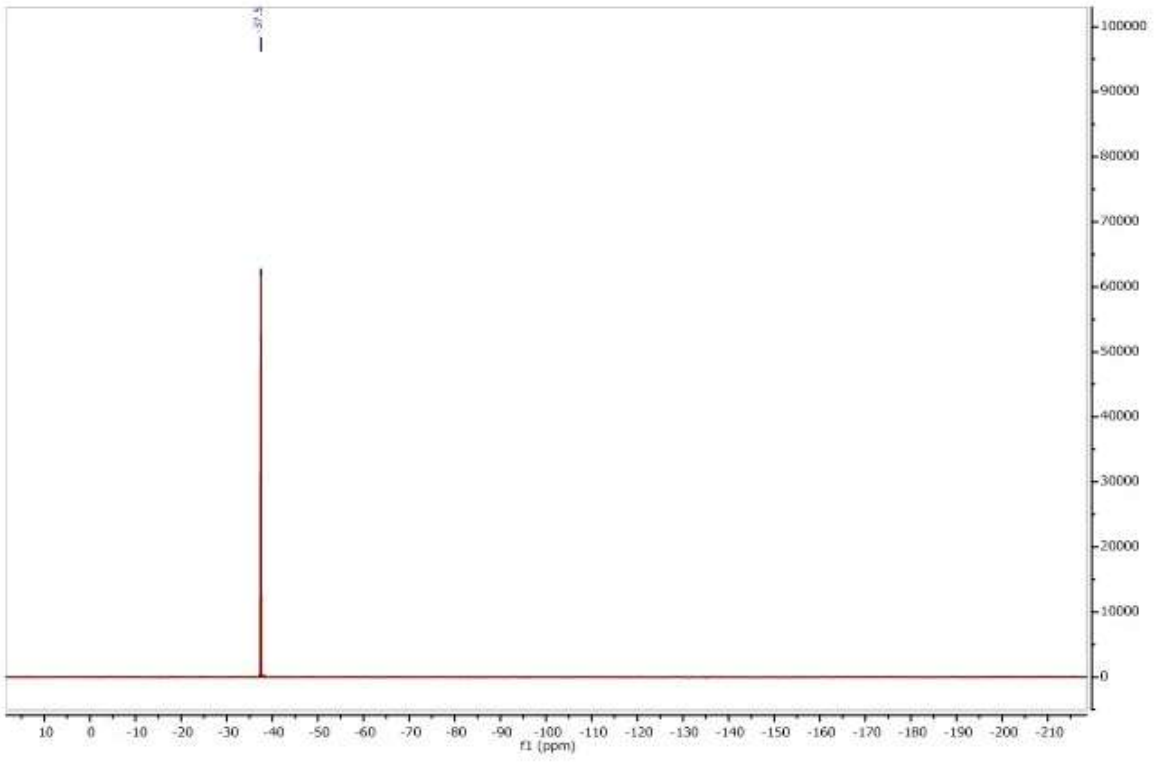



## Copies of chromatograms

### Compound 3e

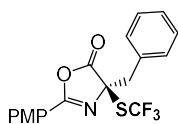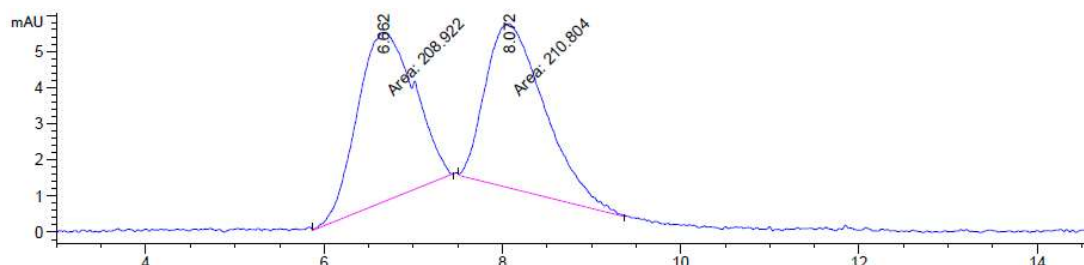

Signal 4: DAD1 D, Sig=280,4 Ref=360,100

| Peak # | RetTime [min] | Type | Width [min] | Area [mAU*s] | Height [mAU] | Area %  |
|--------|---------------|------|-------------|--------------|--------------|---------|
| 1      | 6.662         | MM   | 0.7416      | 208.92213    | 4.69559      | 49.7759 |
| 2      | 8.072         | MM   | 0.7727      | 210.80374    | 4.54689      | 50.2241 |

Totals : 419.72588 9.24248

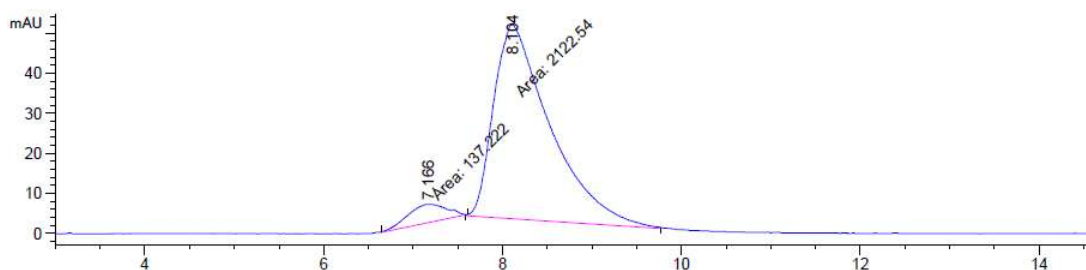

Signal 4: DAD1 D, Sig=280,4 Ref=360,100

| Peak # | RetTime [min] | Type | Width [min] | Area [mAU*s] | Height [mAU] | Area %  |
|--------|---------------|------|-------------|--------------|--------------|---------|
| 1      | 7.166         | MM   | 0.4993      | 137.22189    | 4.58037      | 6.0724  |
| 2      | 8.104         | MM   | 0.7306      | 2122.53687   | 48.41775     | 93.9276 |

# Compound 3f

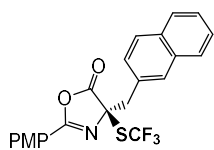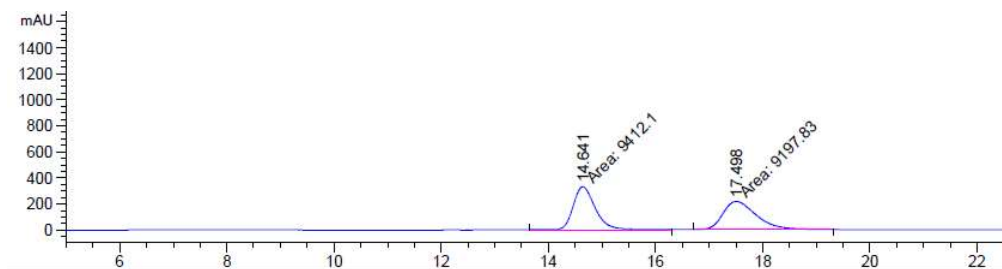

Signal 1: DAD1 A, Sig=254,4 Ref=360,100

| Peak # | RetTime [min] | Type | Width [min] | Area [mAU*s] | Height [mAU] | Area %  |
|--------|---------------|------|-------------|--------------|--------------|---------|
| 1      | 14.641        | MM   | 0.4771      | 9412.09570   | 328.78799    | 50.5757 |
| 2      | 17.498        | MM   | 0.7142      | 9197.83203   | 214.62708    | 49.4243 |

Totals : 1.86099e4 543.41507

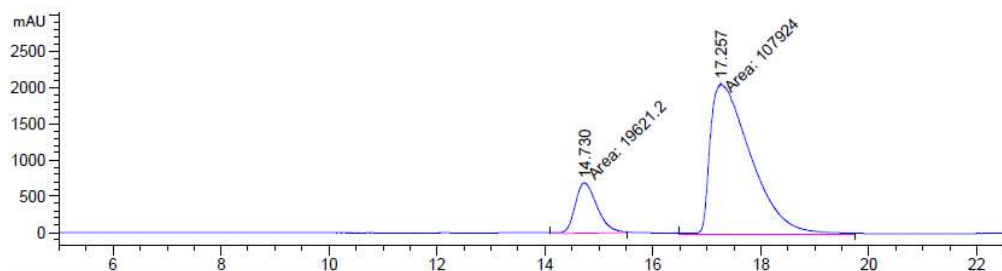

Signal 1: DAD1 A, Sig=254,4 Ref=360,100

| Peak # | RetTime [min] | Type | Width [min] | Area [mAU*s] | Height [mAU] | Area %  |
|--------|---------------|------|-------------|--------------|--------------|---------|
| 1      | 14.730        | MM   | 0.4720      | 1.96212e4    | 692.78754    | 15.3838 |
| 2      | 17.257        | MM   | 0.8618      | 1.07924e5    | 2087.05786   | 84.6162 |

Totals : 1.27545e5 2779.84540

# Compound 3g

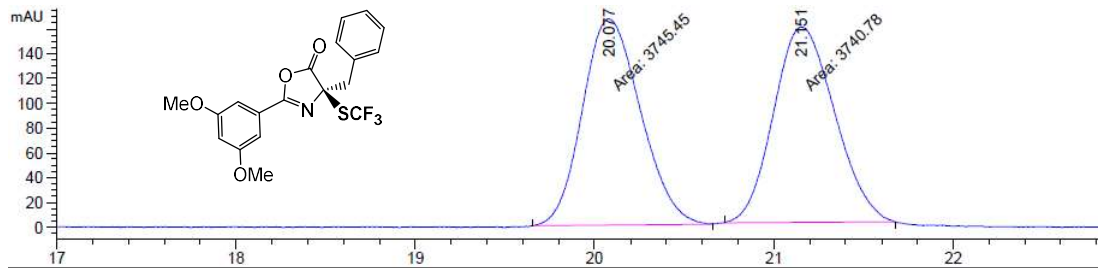

Signal 1: DAD1 A, Sig=254,4 Ref=360,100

| Peak # | RetTime [min] | Type | Width [min] | Area [mAU*s] | Height [mAU] | Area %  |
|--------|---------------|------|-------------|--------------|--------------|---------|
| 1      | 20.077        | MM   | 0.3750      | 3745.44946   | 166.44315    | 50.0312 |
| 2      | 21.151        | MM   | 0.3947      | 3740.78394   | 157.94070    | 49.9688 |

Totals : 7486.23340 324.38385

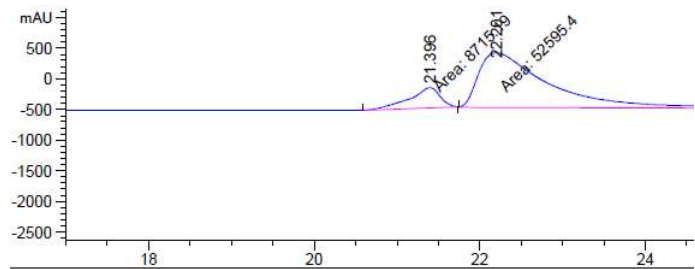

Signal 1: DAD1 A, Sig=254,4 Ref=360,100

| Peak # | RetTime [min] | Type | Width [min] | Area [mAU*s] | Height [mAU] | Area %  |
|--------|---------------|------|-------------|--------------|--------------|---------|
| 1      | 21.396        | MM   | 0.4339      | 8715.18750   | 334.76059    | 14.2148 |
| 2      | 22.201        | MM   | 0.9813      | 5.25954e4    | 893.33795    | 85.7852 |

Totals : 6.13105e4 1228.09854

# Compound 3h

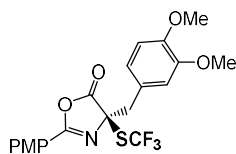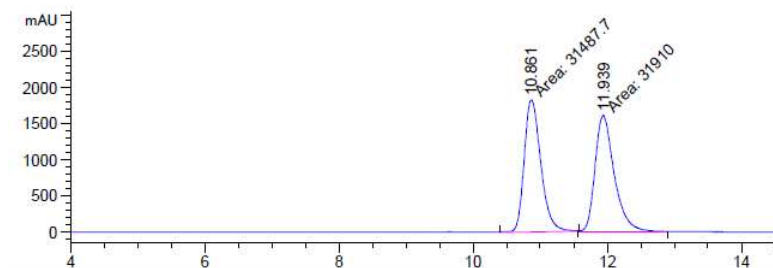

Signal 1: DAD1 A, Sig=254,4 Ref=360,100

| Peak # | RetTime [min] | Type | Width [min] | Area [mAU*s] | Height [mAU] | Area %  |
|--------|---------------|------|-------------|--------------|--------------|---------|
| 1      | 10.861        | MM   | 0.2873      | 3.14877e4    | 1826.38391   | 49.6669 |
| 2      | 11.939        | MM   | 0.3305      | 3.19100e4    | 1609.41138   | 50.3331 |

Totals : 6.33978e4 3435.79529

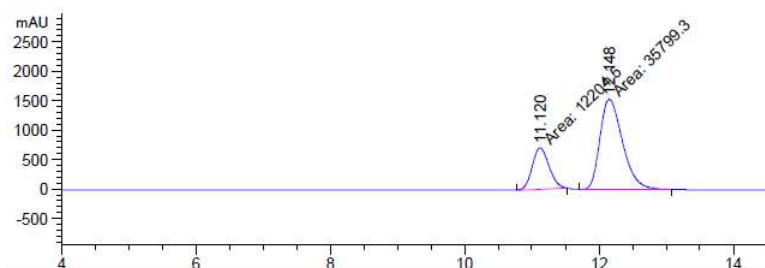

Signal 1: DAD1 A, Sig=254,4 Ref=360,100

| Peak # | RetTime [min] | Type | Width [min] | Area [mAU*s] | Height [mAU] | Area %  |
|--------|---------------|------|-------------|--------------|--------------|---------|
| 1      | 11.120        | MM   | 0.2895      | 1.22045e4    | 702.67035    | 25.4240 |
| 2      | 12.148        | MM   | 0.3896      | 3.57993e4    | 1531.41418   | 74.5760 |

Totals : 4.80038e4 2234.08453

# Compound 3i

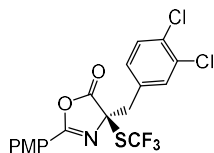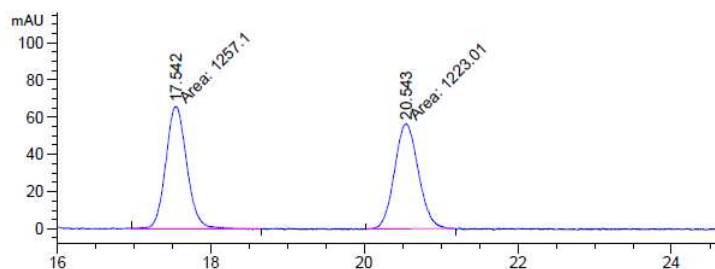

Signal 1: DAD1 A, Sig=254,4 Ref=360,100

| Peak # | RetTime [min] | Type | Width [min] | Area [mAU*s] | Height [mAU] | Area %  |
|--------|---------------|------|-------------|--------------|--------------|---------|
| 1      | 17.542        | MM   | 0.3183      | 1257.09802   | 65.83231     | 50.6873 |
| 2      | 20.543        | MM   | 0.3611      | 1223.00745   | 56.45263     | 49.3127 |

Totals : 2480.10547 122.28493

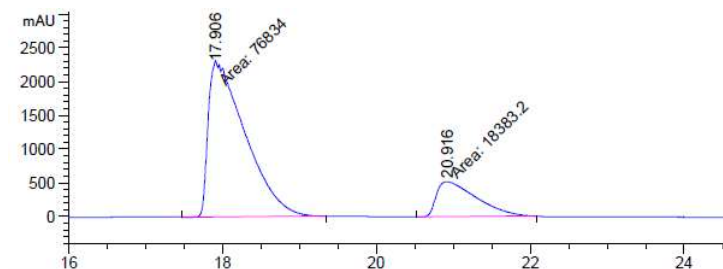

Signal 1: DAD1 A, Sig=254,4 Ref=360,100

| Peak # | RetTime [min] | Type | Width [min] | Area [mAU*s] | Height [mAU] | Area %  |
|--------|---------------|------|-------------|--------------|--------------|---------|
| 1      | 17.906        | MM   | 0.5558      | 7.68340e4    | 2304.09839   | 80.6934 |
| 2      | 20.916        | MM   | 0.5945      | 1.83832e4    | 515.37238    | 19.3066 |

Totals : 9.52172e4 2819.47076

# Compound 3j

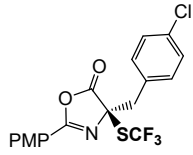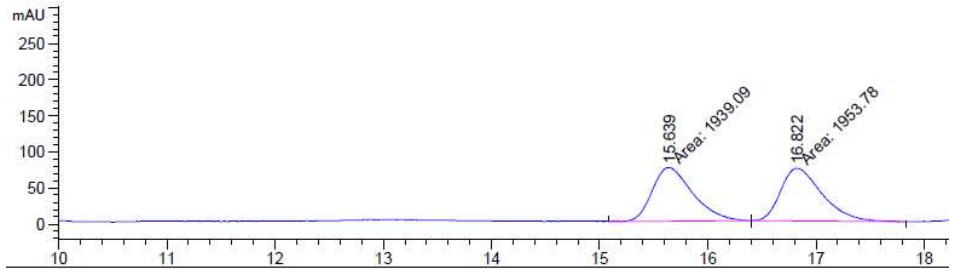

Signal 1: DAD1 A, Sig=254,4 Ref=360,100

| Peak # | RetTime [min] | Type | Width [min] | Area [mAU*s] | Height [mAU] | Area %  |
|--------|---------------|------|-------------|--------------|--------------|---------|
| 1      | 15.639        | MM   | 0.4344      | 1939.09045   | 74.39991     | 49.8113 |
| 2      | 16.822        | MM   | 0.4453      | 1953.77966   | 73.13407     | 50.1887 |

Totals : 3892.87012 147.53398

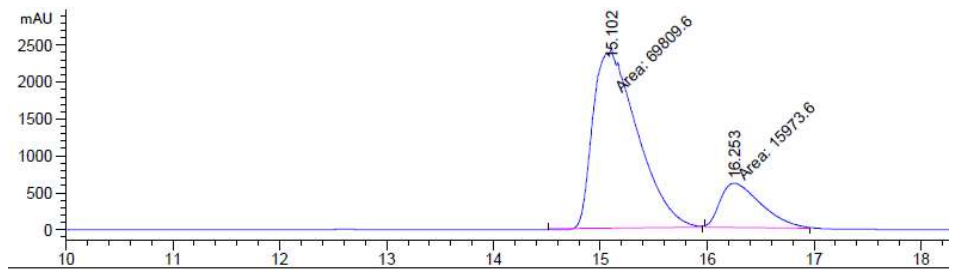

Signal 1: DAD1 A, Sig=254,4 Ref=360,100

| Peak # | RetTime [min] | Type | Width [min] | Area [mAU*s] | Height [mAU] | Area %  |
|--------|---------------|------|-------------|--------------|--------------|---------|
| 1      | 15.102        | MM   | 0.4789      | 6.98096e4    | 2429.45972   | 81.3792 |
| 2      | 16.253        | MM   | 0.4434      | 1.59736e4    | 600.45313    | 18.6208 |

Totals : 8.57832e4 3029.91284

# Compound 3k

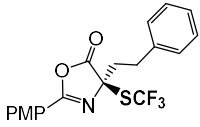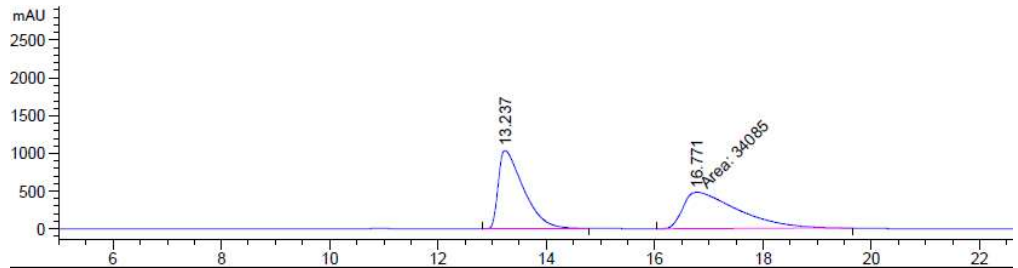

Signal 1: DAD1 A, Sig=254,4 Ref=360,100

| Peak # | RetTime [min] | Type | Width [min] | Area [mAU*s] | Height [mAU] | Area %  |
|--------|---------------|------|-------------|--------------|--------------|---------|
| 1      | 13.237        | VV   | 0.4260      | 3.36488e4    | 1038.55286   | 49.6780 |
| 2      | 16.771        | MM   | 1.1794      | 3.40850e4    | 481.66440    | 50.3220 |

Totals : 6.77338e4 1520.21725

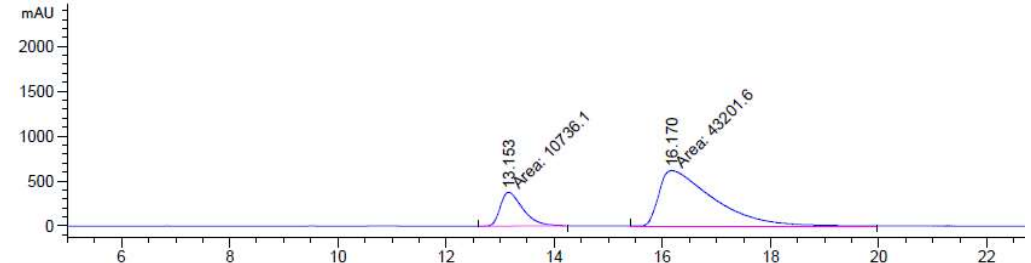

Signal 1: DAD1 A, Sig=254,4 Ref=360,100

| Peak # | RetTime [min] | Type | Width [min] | Area [mAU*s] | Height [mAU] | Area %  |
|--------|---------------|------|-------------|--------------|--------------|---------|
| 1      | 13.153        | MM   | 0.4782      | 1.07361e4    | 374.15536    | 19.9047 |
| 2      | 16.170        | MM   | 1.1661      | 4.32016e4    | 617.44269    | 80.0953 |

Totals : 5.39377e4 991.59805

# Compound 31

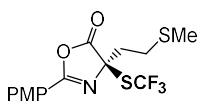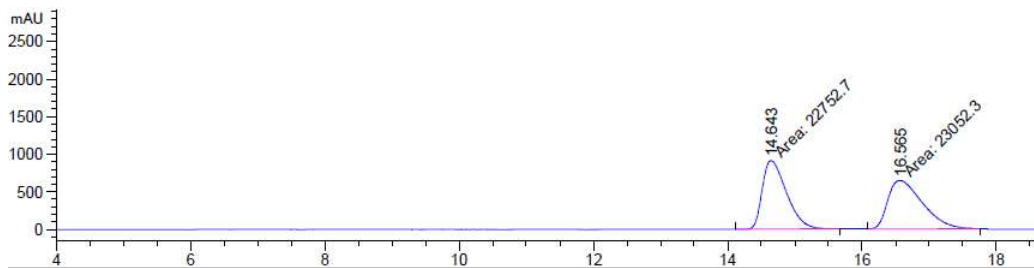

Signal 1: DAD1 A, Sig=254,4 Ref=360,100

| Peak # | RetTime [min] | Type | Width [min] | Area [mAU*s] | Height [mAU] | Area %  |
|--------|---------------|------|-------------|--------------|--------------|---------|
| 1      | 14.643        | MM   | 0.4165      | 2.27527e4    | 910.36652    | 49.6730 |
| 2      | 16.565        | MM   | 0.5954      | 2.30523e4    | 645.27203    | 50.3270 |

Totals : 4.58050e4 1555.63855

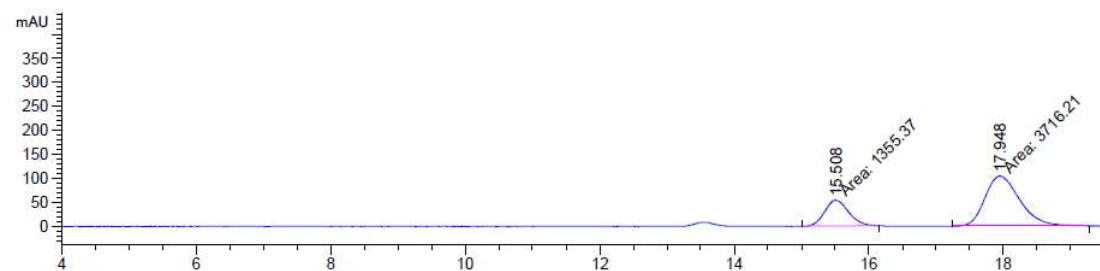

Signal 1: DAD1 A, Sig=254,4 Ref=360,100

| Peak # | RetTime [min] | Type | Width [min] | Area [mAU*s] | Height [mAU] | Area %  |
|--------|---------------|------|-------------|--------------|--------------|---------|
| 1      | 15.508        | MM   | 0.4190      | 1355.36768   | 53.90687     | 26.7248 |
| 2      | 17.948        | MM   | 0.5975      | 3716.20532   | 103.65303    | 73.2752 |

Totals : 5071.57300 157.55990



# Compound 3m

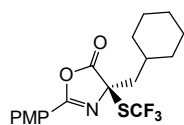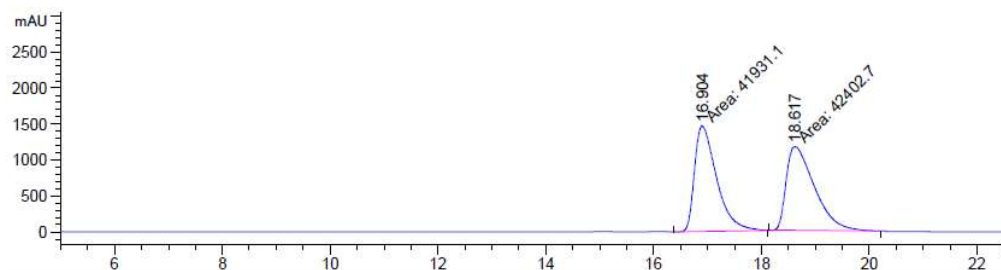

Signal 1: DAD1 A, Sig=254,4 Ref=360,100

| Peak # | RetTime [min] | Type | Width [min] | Area [mAU*s] | Height [mAU] | Area %  |
|--------|---------------|------|-------------|--------------|--------------|---------|
| 1      | 16.904        | MM   | 0.4760      | 4.19311e4    | 1468.31055   | 49.7204 |
| 2      | 18.617        | MM   | 0.6081      | 4.24027e4    | 1162.21411   | 50.2796 |

Totals : 8.43339e4 2630.52466

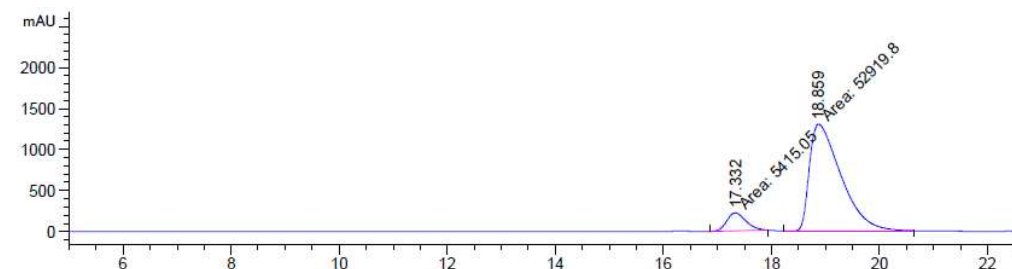

Signal 1: DAD1 A, Sig=254,4 Ref=360,100

| Peak # | RetTime [min] | Type | Width [min] | Area [mAU*s] | Height [mAU] | Area %  |
|--------|---------------|------|-------------|--------------|--------------|---------|
| 1      | 17.332        | MM   | 0.4112      | 5415.05078   | 219.50145    | 9.2827  |
| 2      | 18.859        | MM   | 0.6785      | 5.29198e4    | 1299.93848   | 90.7173 |

Totals : 5.83348e4 1519.43993

# Compound 3n

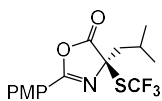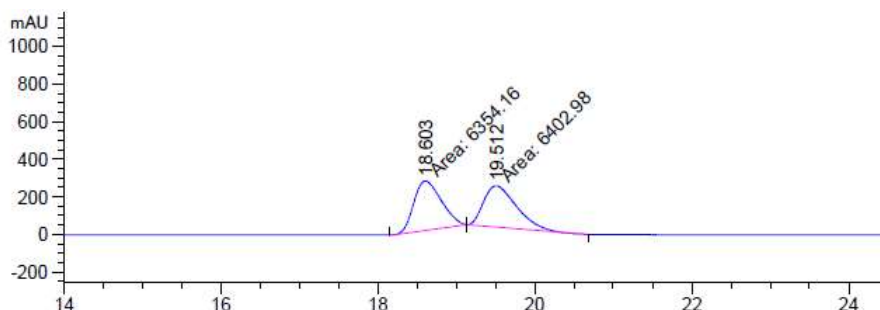

Signal 1: DAD1 A, Sig=254,4 Ref=360,100

| Peak # | RetTime [min] | Type | Width [min] | Area [mAU*s] | Height [mAU] | Area %  |
|--------|---------------|------|-------------|--------------|--------------|---------|
| 1      | 18.603        | MM   | 0.4043      | 6354.16064   | 261.97104    | 49.8087 |
| 2      | 19.512        | MM   | 0.4875      | 6402.97900   | 218.90417    | 50.1913 |

Totals : 1.27571e4 480.87521

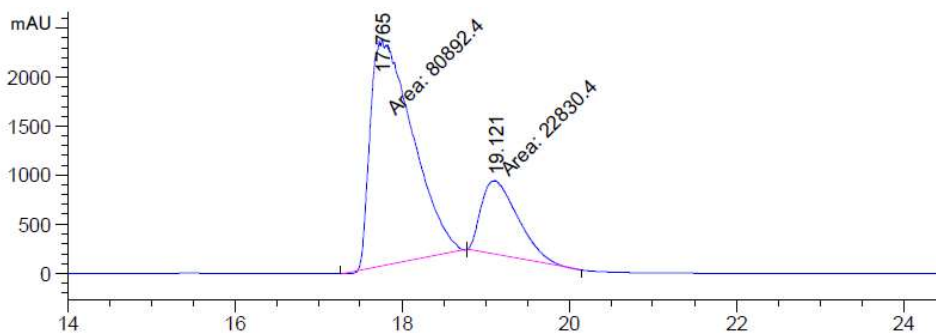

Signal 1: DAD1 A, Sig=254,4 Ref=360,100

| Peak # | RetTime [min] | Type | Width [min] | Area [mAU*s] | Height [mAU] | Area %  |
|--------|---------------|------|-------------|--------------|--------------|---------|
| 1      | 17.765        | MM   | 0.5820      | 8.08924e4    | 2316.66431   | 77.9890 |
| 2      | 19.121        | MM   | 0.5095      | 2.28304e4    | 746.82599    | 22.0110 |

Totals : 1.03723e5 3063.49030

# Compound 3o

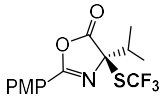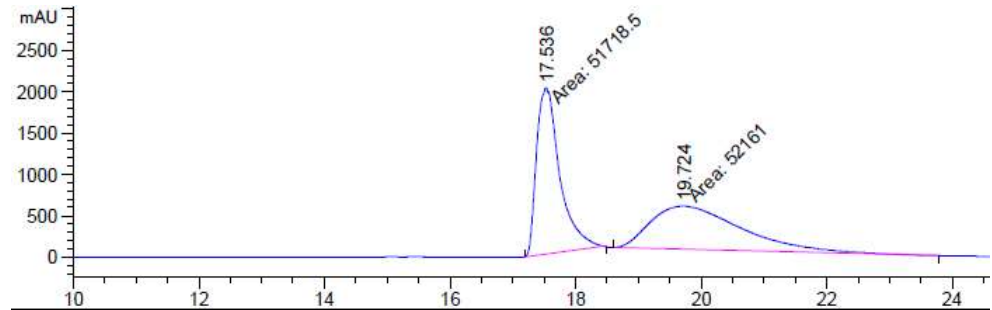

Signal 1: DAD1 A, Sig=254,4 Ref=360,100

| Peak # | RetTime [min] | Type | Width [min] | Area [mAU*s] | Height [mAU] | Area %  |
|--------|---------------|------|-------------|--------------|--------------|---------|
| 1      | 17.536        | MM   | 0.4287      | 5.17185e4    | 2010.45935   | 49.7870 |
| 2      | 19.724        | MM   | 1.6709      | 5.21610e4    | 520.29285    | 50.2130 |

Totals : 1.03879e5 2530.75220

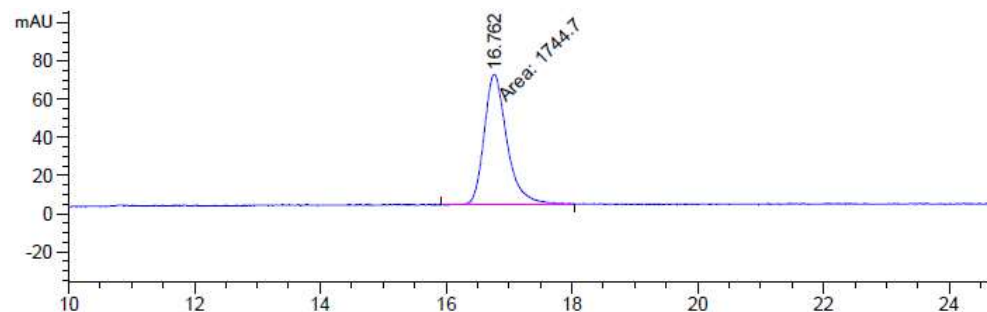

Signal 1: DAD1 A, Sig=254,4 Ref=360,100

| Peak # | RetTime [min] | Type | Width [min] | Area [mAU*s] | Height [mAU] | Area %   |
|--------|---------------|------|-------------|--------------|--------------|----------|
| 1      | 16.762        | MM   | 0.4255      | 1744.70483   | 68.34391     | 100.0000 |

Totals : 1744.70483 68.34391

# Compound 3a

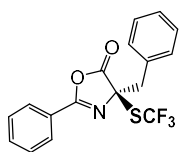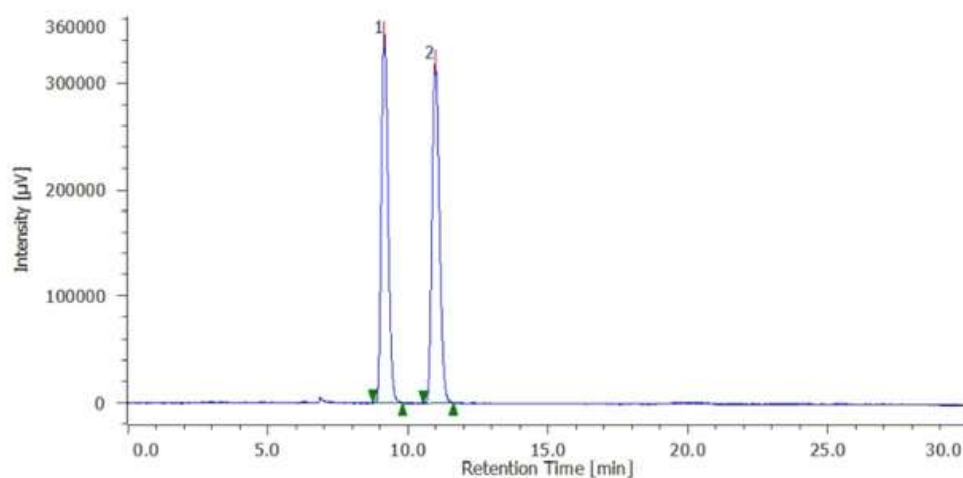

| # | Peak Name | CH | tR [min] | Area [µV·sec] | Height [µV] | Area%  | Height% | Quantity | NTP  | Resolution | Symmetry Factor | Warning |
|---|-----------|----|----------|---------------|-------------|--------|---------|----------|------|------------|-----------------|---------|
| 1 | Unknown   | 10 | 9.150    | 5723324       | 345713      | 49.481 | 52.014  | N/A      | 6943 | 3.951      | 1.267           |         |
| 2 | Unknown   | 10 | 10.974   | 5843411       | 318946      | 50.519 | 47.986  | N/A      | 8144 | N/A        | 1.208           |         |

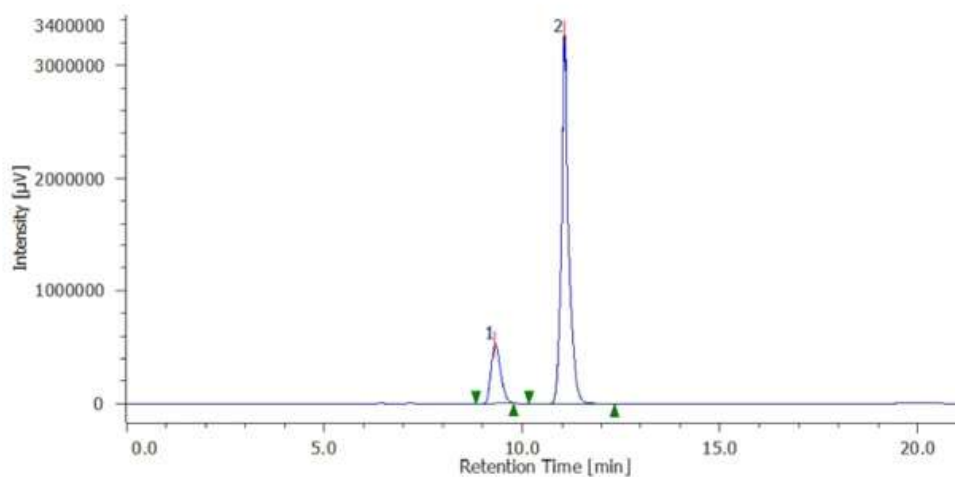

| # | Peak Name | CH | tR [min] | Area [µV·sec] | Height [µV] | Area%  | Height% | Quantity | NTP   | Resolution | Symmetry Factor | Warning |
|---|-----------|----|----------|---------------|-------------|--------|---------|----------|-------|------------|-----------------|---------|
| 1 | Unknown   | 9  | 9.313    | 8908785       | 525720      | 17.655 | 13.796  | N/A      | 6824  | 4.931      | 1.292           |         |
| 2 | Unknown   | 9  | 11.066   | 41552503      | 3284902     | 82.345 | 86.204  | N/A      | 28592 | N/A        | 1.276           |         |

# Compound 3d

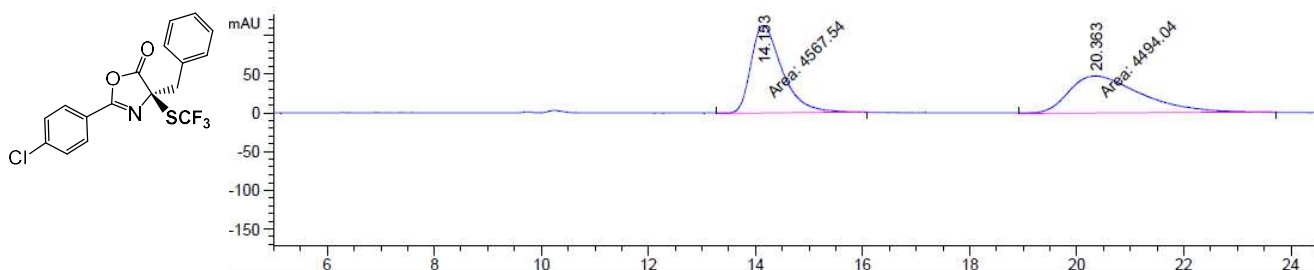

Signal 1: DAD1 A, Sig=254,4 Ref=360,100

| Peak # | RetTime [min] | Type | Width [min] | Area [mAU*s] | Height [mAU] | Area %  |
|--------|---------------|------|-------------|--------------|--------------|---------|
| 1      | 14.153        | MM   | 0.6748      | 4567.53711   | 112.80434    | 50.4055 |
| 2      | 20.363        | MM   | 1.5635      | 4494.04297   | 47.90648     | 49.5945 |

Totals : 9061.58008 160.71082

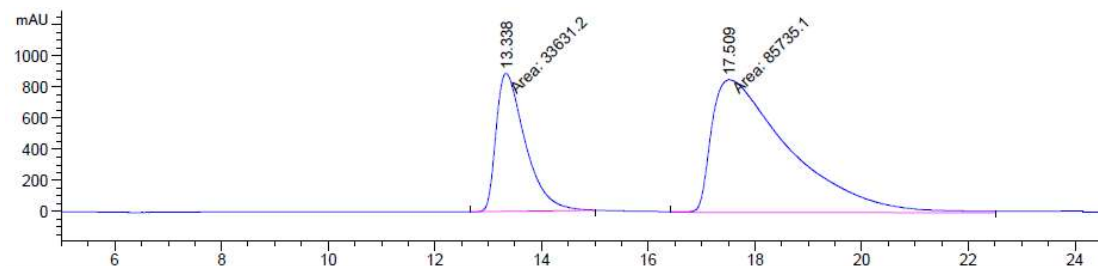

Signal 1: DAD1 A, Sig=254,4 Ref=360,100

| Peak # | RetTime [min] | Type | Width [min] | Area [mAU*s] | Height [mAU] | Area %  |
|--------|---------------|------|-------------|--------------|--------------|---------|
| 1      | 13.338        | MM   | 0.6323      | 3.36312e4    | 886.43542    | 28.1748 |
| 2      | 17.509        | MM   | 1.6781      | 8.57351e4    | 851.51392    | 71.8252 |

Totals : 1.19366e5 1737.94934
